# Supplementary material for: Bacteria in the oral cavity of individuals consuming intoxicating substances
Source: PubMed Central journal article supplement (PMC10218728; doi:10.1371/journal.pone.0285753), 2023-05-26
Supplement: pone.0285753.s001.pdf [file pone.0285753.s001.pdf]

**S1-Table: List of the participants and their gender.**

| Participant ID | Male (1) /Female (2) | Participant ID | Male (1) /Female (2) | Participant ID | Male (1) /Female (2) | Participant ID | Male (1) /Female (2) | Participant ID | Male (1) /Female (2) | Participant ID | Male (1) /Female (2) |
|----------------|----------------------|----------------|----------------------|----------------|----------------------|----------------|----------------------|----------------|----------------------|----------------|----------------------|
| 101            | 1                    | 128            | 2                    | 155            | 1                    | 182            | 1                    | 209            | 2                    | 236            | 1                    |
| 102            | 1                    | 129            | 1                    | 156            | 1                    | 183            | 2                    | 210            | 2                    | 237            | 1                    |
| 103            | 2                    | 130            | 2                    | 157            | 2                    | 184            | 2                    | 211            | 2                    | 238            | 1                    |
| 104            | 1                    | 131            | 1                    | 158            | 2                    | 185            | 2                    | 212            | 1                    | 239            | 1                    |
| 105            | 2                    | 132            | 1                    | 159            | 2                    | 186            | 1                    | 213            | 2                    | 240            | 2                    |
| 106            | 2                    | 133            | 1                    | 160            | 1                    | 187            | 1                    | 214            | 1                    | 241            | 1                    |
| 107            | 1                    | 134            | 1                    | 161            | 1                    | 188            | 1                    | 215            | 2                    | 242            | 1                    |
| 108            | 2                    | 135            | 1                    | 162            | 1                    | 189            | 1                    | 216            | 2                    | 243            | 1                    |
| 109            | 1                    | 136            | 1                    | 163            | 2                    | 190            | 1                    | 217            | 2                    | 244            | 1                    |
| 110            | 2                    | 137            | 1                    | 164            | 2                    | 191            | 1                    | 218            | 2                    | 245            | 1                    |
| 111            | 2                    | 138            | 1                    | 165            | 2                    | 192            | 1                    | 219            | 2                    | 246            | 1                    |
| 112            | 1                    | 139            | 1                    | 166            | 2                    | 193            | 2                    | 220            | 2                    | 247            | 1                    |
| 113            | 2                    | 140            | 2                    | 167            | 2                    | 194            | 1                    | 221            | 1                    | 248            | 1                    |
| 114            | 1                    | 141            | 1                    | 168            | 2                    | 195            | 1                    | 222            | 2                    | 249            | 1                    |
| 115            | 1                    | 142            | 1                    | 169            | 2                    | 196            | 1                    | 223            | 2                    | 250            | 1                    |
| 116            | 1                    | 143            | 2                    | 170            | 2                    | 197            | 2                    | 224            | 2                    | 251            | 1                    |
| 117            | 1                    | 144            | 2                    | 171            | 2                    | 198            | 1                    | 225            | 2                    | 252            | 2                    |
| 118            | 1                    | 145            | 1                    | 172            | 2                    | 199            | 1                    | 226            | 2                    | 253            | 2                    |
| 119            | 1                    | 146            | 2                    | 173            | 2                    | 200            | 1                    | 227            | 2                    | 254            | 2                    |
| 120            | 2                    | 147            | 2                    | 174            | 2                    | 201            | 2                    | 228            | 1                    | 255            | 1                    |
| 121            | 1                    | 148            | 1                    | 175            | 2                    | 202            | 1                    | 229            | 2                    | 256            | 1                    |
| 122            | 1                    | 149            | 2                    | 176            | 2                    | 203            | 2                    | 230            | 1                    | 257            | 2                    |
| 123            | 1                    | 150            | 1                    | 177            | 2                    | 204            | 1                    | 231            | 1                    | 258            | 1                    |
| 124            | 2                    | 151            | 1                    | 178            | 2                    | 205            | 2                    | 232            | 1                    | 259            | 2                    |
| 125            | 1                    | 152            | 1                    | 179            | 1                    | 206            | 1                    | 233            | 1                    | 260            | 1                    |
| 126            | 2                    | 153            | 1                    | 180            | 1                    | 207            | 2                    | 234            | 1                    | 261            | 2                    |
| 127            | 2                    | 154            | 1                    | 181            | 1                    | 208            | 1                    | 235            | 1                    | 262            | 2                    |

| Participant ID | Male (1) /Female (2)<br>Participant ID |     | Male (1)<br>/Female<br>(2) | Participant ID | Male (1)<br>/Female<br>(2) | Participant ID | Male (1)<br>/Female<br>(2) | Participant ID | Male (1)<br>/Female<br>(2) |
|----------------|----------------------------------------|-----|----------------------------|----------------|----------------------------|----------------|----------------------------|----------------|----------------------------|
| 263            | 1                                      | 291 | 1                          | 319            | 2                          | 347            | 2                          | 375            | 2                          |
| 264            | 1                                      | 292 | 1                          | 320            | 1                          | 348            | 2                          | 376            | 1                          |
| 265            | 1                                      | 293 | 1                          | 321            | 1                          | 349            | 2                          | 377            | 1                          |
| 266            | 1                                      | 294 | 1                          | 322            | 2                          | 350            | 2                          | 378            | 1                          |
| 267            | 1                                      | 295 | 1                          | 323            | 2                          | 351            | 2                          | 379            | 2                          |
| 268            | 1                                      | 296 | 2                          | 324            | 2                          | 352            | 2                          | 380            | 1                          |
| 269            | 1                                      | 297 | 1                          | 325            | 2                          | 353            | 2                          | 381            | 2                          |
| 270            | 1                                      | 298 | 1                          | 326            | 1                          | 354            | 2                          | 382            | 1                          |
| 271            | 1                                      | 299 | 1                          | 327            | 2                          | 355            | 2                          | 383            | 2                          |
| 272            | 1                                      | 300 | 1                          | 328            | 2                          | 356            | 2                          | 384            | 2                          |
| 273            | 1                                      | 301 | 1                          | 329            | 1                          | 357            | 1                          | 385            | 2                          |
| 274            | 1                                      | 302 | 1                          | 330            | 1                          | 358            | 2                          | 386            | 1                          |
| 275            | 1                                      | 303 | 1                          | 331            | 2                          | 359            | 1                          | 387            | 1                          |
| 276            | 1                                      | 304 | 1                          | 332            | 2                          | 360            | 1                          | 388            | 1                          |
| 277            | 1                                      | 305 | 1                          | 333            | 2                          | 361            | 1                          | 389            | 1                          |
| 278            | 1                                      | 306 | 1                          | 334            | 2                          | 362            | 1                          | 390            | 1                          |
| 279            | 1                                      | 307 | 1                          | 335            | 2                          | 363            | 1                          | 391            | 1                          |
| 280            | 1                                      | 308 | 2                          | 336            | 2                          | 364            | 1                          | 392            | 1                          |
| 281            | 1                                      | 309 | 2                          | 337            | 1                          | 365            | 2                          | 393            | 1                          |
| 282            | 1                                      | 310 | 1                          | 338            | 1                          | 366            | 2                          | 394            | 1                          |
| 283            | 1                                      | 311 | 1                          | 339            | 1                          | 367            | 1                          | 395            | 1                          |
| 284            | 1                                      | 312 | 1                          | 340            | 1                          | 368            | 2                          | 396            | 1                          |
| 285            | 1                                      | 313 | 1                          | 341            | 2                          | 369            | 1                          | 397            | 1                          |
| 286            | 1                                      | 314 | 1                          | 342            | 2                          | 370            | 2                          | 398            | 1                          |
| 287            | 1                                      | 315 | 1                          | 343            | 2                          | 371            | 1                          | 399            | 1                          |
| 288            | 1                                      | 316 | 1                          | 344            | 1                          | 372            | 2                          | 400            | 1                          |
| 289            | 1                                      | 317 | 1                          | 345            | 1                          | 373            | 2                          |                |                            |
| 290            | 2                                      | 318 | 2                          | 346            | 1                          | 374            | 2                          |                |                            |

|              | No. of Participants |
|--------------|---------------------|
| Male:        | 183                 |
| Female:      | 117                 |
| <b>TOTAL</b> | <b>300</b>          |

The personal information of the participants such as location, age, name, address is not shown in the table. Three hundred individuals containing 183 male and 117 females were interviewed and oral swab were collected.
