# Supplementary material for: Bacteria in the oral cavity of individuals consuming intoxicating substances
Source: PubMed Central journal article supplement (PMC10218728; doi:10.1371/journal.pone.0285753), 2023-05-26
Supplement: pone.0285753.s002.pdf [file pone.0285753.s002.pdf]

**S2-Table: Record of the consumption of different intoxicating substances, based on participant's statements.**

| PARTICIPANT ID | (1 = YES, 0 = NO) |                                                            |                             |                             |                              |                              |                 |         |                 |
|----------------|-------------------|------------------------------------------------------------|-----------------------------|-----------------------------|------------------------------|------------------------------|-----------------|---------|-----------------|
|                | BETEL NUT         | BETEL NUT WITH LIME<br>(Process include extra use of lime) | ZARDA PAN (Dried Betel nut) | MITHA PAN (Dried Betel nut) | GUTKHA (Processed Betel nut) | SIKHAR (Processed Betel nut) | SMOKING TOBACCO | ALCOHOL | CHEWING TOBACCO |
| 101            | 1                 | 1                                                          | 1                           | 0                           | 0                            | 0                            | 1               | 0       | 0               |
| 102            | 1                 | 1                                                          | 0                           | 1                           | 0                            | 0                            | 0               | 0       | 0               |
| 103            | 0                 | 0                                                          | 0                           | 0                           | 0                            | 0                            | 0               | 0       | 1               |
| 104            | 1                 | 0                                                          | 0                           | 1                           | 0                            | 0                            | 0               | 0       | 0               |
| 105            | 1                 | 0                                                          | 0                           | 0                           | 0                            | 0                            | 0               | 0       | 0               |
| 106            | 0                 | 0                                                          | 0                           | 0                           | 0                            | 0                            | 0               | 0       | 0               |
| 107            | 0                 | 0                                                          | 0                           | 0                           | 0                            | 0                            | 0               | 0       | 0               |
| 108            | 0                 | 0                                                          | 0                           | 0                           | 0                            | 0                            | 0               | 0       | 0               |
| 109            | 0                 | 0                                                          | 1                           | 1                           | 0                            | 0                            | 1               | 0       | 0               |
| 110            | 1                 | 0                                                          | 0                           | 1                           | 1                            | 1                            | 1               | 1       | 0               |
| 111            | 1                 | 0                                                          | 0                           | 1                           | 0                            | 0                            | 0               | 0       | 0               |
| 112            | 1                 | 0                                                          | 1                           | 0                           | 0                            | 0                            | 1               | 0       | 0               |
| 113            | 1                 | 0                                                          | 0                           | 1                           | 0                            | 0                            | 0               | 0       | 0               |
| 114            | 1                 | 1                                                          | 1                           | 0                           | 1                            | 1                            | 0               | 1       | 0               |
| 115            | 1                 | 0                                                          | 0                           | 1                           | 0                            | 0                            | 1               | 0       | 0               |
| 116            | 1                 | 1                                                          | 0                           | 0                           | 0                            | 0                            | 1               | 0       | 0               |
| 117            | 0                 | 0                                                          | 0                           | 1                           | 0                            | 0                            | 1               | 0       | 0               |
| 118            | 1                 | 1                                                          | 1                           | 1                           | 1                            | 1                            | 1               | 1       | 0               |
| 119            | 1                 | 0                                                          | 1                           | 1                           | 0                            | 0                            | 0               | 0       | 0               |
| 120            | 1                 | 0                                                          | 0                           | 1                           | 0                            | 0                            | 0               | 0       | 0               |
| 121            | 0                 | 0                                                          | 0                           | 1                           | 0                            | 1                            | 1               | 1       | 0               |
| 122            | 0                 | 0                                                          | 0                           | 0                           | 0                            | 0                            | 0               | 0       | 0               |
| 123            | 1                 | 1                                                          | 1                           | 1                           | 1                            | 1                            | 1               | 1       | 0               |
| 124            | 0                 | 0                                                          | 0                           | 0                           | 0                            | 0                            | 0               | 1       | 0               |
| 125            | 0                 | 0                                                          | 0                           | 0                           | 0                            | 0                            | 0               | 0       | 0               |
| 126            | 1                 | 0                                                          | 0                           | 0                           | 0                            | 0                            | 0               | 0       | 0               |
| 127            | 1                 | 0                                                          | 0                           | 1                           | 0                            | 0                            | 0               | 0       | 0               |

|     |   |   |   |   |   |   |   |   |   |
|-----|---|---|---|---|---|---|---|---|---|
| 128 | 0 | 0 | 0 | 1 | 0 | 0 | 0 | 0 | 0 |
| 129 | 0 | 0 | 1 | 1 | 0 | 0 | 1 | 0 | 0 |
| 130 | 0 | 0 | 0 | 0 | 0 | 0 | 0 | 0 | 0 |
| 131 | 0 | 0 | 0 | 1 | 0 | 0 | 0 | 0 | 0 |
| 132 | 1 | 1 | 1 | 1 | 1 | 1 | 1 | 1 | 1 |
| 133 | 1 | 0 | 0 | 1 | 1 | 1 | 1 | 1 | 0 |
| 134 | 0 | 0 | 0 | 0 | 0 | 0 | 0 | 0 | 0 |
| 135 | 1 | 1 | 1 | 0 | 1 | 1 | 0 | 0 | 0 |
| 136 | 0 | 0 | 0 | 0 | 0 | 0 | 0 | 1 | 0 |
| 137 | 0 | 0 | 0 | 0 | 0 | 0 | 0 | 0 | 0 |
| 138 | 1 | 0 | 0 | 1 | 0 | 0 | 0 | 1 | 0 |
| 139 | 1 | 0 | 1 | 1 | 0 | 1 | 1 | 1 | 0 |
| 140 | 0 | 0 | 0 | 0 | 0 | 0 | 0 | 0 | 0 |
| 141 | 0 | 0 | 0 | 0 | 0 | 0 | 1 | 0 | 0 |
| 142 | 1 | 0 | 1 | 1 | 1 | 0 | 1 | 0 | 0 |
| 143 | 1 | 1 | 0 | 1 | 1 | 0 | 0 | 0 | 0 |
| 144 | 1 | 1 | 0 | 1 | 0 | 0 | 0 | 0 | 0 |
| 145 | 0 | 0 | 0 | 0 | 0 | 0 | 0 | 0 | 0 |
| 146 | 1 | 1 | 1 | 1 | 0 | 1 | 0 | 1 | 0 |
| 147 | 1 | 1 | 0 | 0 | 0 | 1 | 0 | 0 | 1 |
| 148 | 1 | 1 | 0 | 1 | 1 | 0 | 0 | 0 | 0 |
| 149 | 0 | 0 | 0 | 0 | 0 | 0 | 0 | 0 | 0 |
| 150 | 1 | 0 | 1 | 0 | 1 | 0 | 1 | 0 | 0 |
| 151 | 1 | 0 | 0 | 1 | 1 | 0 | 1 | 1 | 0 |
| 152 | 0 | 0 | 0 | 1 | 0 | 0 | 1 | 1 | 0 |
| 153 | 0 | 0 | 0 | 1 | 0 | 0 | 0 | 0 | 0 |
| 154 | 1 | 1 | 0 | 1 | 0 | 0 | 0 | 0 | 0 |
| 155 | 1 | 1 | 1 | 0 | 1 | 0 | 0 | 0 | 0 |
| 156 | 0 | 0 | 1 | 0 | 1 | 1 | 0 | 0 | 0 |
| 157 | 0 | 0 | 0 | 1 | 0 | 0 | 0 | 0 | 0 |
| 158 | 0 | 0 | 0 | 1 | 0 | 0 | 0 | 0 | 0 |
| 159 | 0 | 0 | 0 | 0 | 1 | 0 | 0 | 0 | 0 |

|     |   |   |   |   |   |   |   |   |   |
|-----|---|---|---|---|---|---|---|---|---|
| 160 | 0 | 0 | 0 | 0 | 1 | 0 | 0 | 0 | 0 |
| 161 | 1 | 1 | 1 | 1 | 0 | 0 | 0 | 1 | 0 |
| 162 | 0 | 0 | 0 | 0 | 1 | 0 | 0 | 1 | 0 |
| 163 | 1 | 1 | 1 | 0 | 0 | 0 | 0 | 1 | 0 |
| 164 | 1 | 1 | 0 | 0 | 0 | 0 | 0 | 0 | 0 |
| 165 | 1 | 1 | 0 | 0 | 0 | 0 | 0 | 0 | 0 |
| 166 | 1 | 0 | 0 | 0 | 0 | 0 | 0 | 0 | 0 |
| 167 | 1 | 1 | 0 | 0 | 0 | 0 | 0 | 1 | 0 |
| 168 | 1 | 1 | 0 | 0 | 0 | 0 | 0 | 0 | 0 |
| 169 | 1 | 1 | 0 | 0 | 0 | 0 | 0 | 0 | 0 |
| 170 | 1 | 1 | 1 | 0 | 0 | 0 | 0 | 0 | 0 |
| 171 | 1 | 1 | 0 | 0 | 0 | 0 | 0 | 0 | 0 |
| 172 | 1 | 1 | 0 | 0 | 0 | 0 | 0 | 0 | 0 |
| 173 | 1 | 1 | 0 | 0 | 0 | 0 | 0 | 0 | 0 |
| 174 | 1 | 1 | 0 | 0 | 0 | 0 | 0 | 0 | 0 |
| 175 | 1 | 1 | 1 | 0 | 0 | 0 | 0 | 0 | 0 |
| 176 | 1 | 1 | 0 | 1 | 0 | 0 | 0 | 0 | 0 |
| 177 | 1 | 1 | 0 | 0 | 0 | 0 | 0 | 0 | 0 |
| 178 | 1 | 1 | 1 | 0 | 0 | 0 | 0 | 0 | 0 |
| 179 | 1 | 1 | 1 | 0 | 0 | 0 | 0 | 0 | 0 |
| 180 | 1 | 1 | 0 | 1 | 0 | 0 | 0 | 1 | 0 |
| 181 | 0 | 0 | 0 | 0 | 1 | 1 | 0 | 0 | 0 |
| 182 | 0 | 0 | 0 | 0 | 1 | 1 | 0 | 0 | 0 |
| 183 | 1 | 0 | 0 | 0 | 0 | 0 | 0 | 0 | 0 |
| 184 | 0 | 0 | 0 | 0 | 0 | 0 | 0 | 0 | 0 |
| 185 | 1 | 0 | 0 | 0 | 1 | 0 | 0 | 0 | 0 |
| 186 | 1 | 0 | 1 | 0 | 1 | 1 | 0 | 0 | 0 |
| 187 | 0 | 0 | 0 | 1 | 0 | 0 | 0 | 0 | 0 |
| 188 | 1 | 0 | 1 | 0 | 1 | 1 | 0 | 0 | 1 |
| 189 | 1 | 0 | 0 | 1 | 0 | 0 | 0 | 1 | 0 |
| 190 | 0 | 0 | 0 | 0 | 1 | 1 | 0 | 0 | 1 |
| 191 | 1 | 0 | 1 | 0 | 1 | 0 | 0 | 0 | 1 |

|     |   |   |   |   |   |   |   |   |   |
|-----|---|---|---|---|---|---|---|---|---|
| 192 | 0 | 0 | 1 | 0 | 1 | 0 | 0 | 1 | 1 |
| 193 | 0 | 0 | 1 | 0 | 0 | 0 | 0 | 0 | 0 |
| 194 | 0 | 0 | 1 | 0 | 1 | 1 | 0 | 1 | 0 |
| 195 | 0 | 0 | 0 | 0 | 0 | 0 | 0 | 0 | 0 |
| 196 | 0 | 0 | 0 | 1 | 1 | 0 | 0 | 1 | 0 |
| 197 | 1 | 0 | 0 | 1 | 0 | 0 | 0 | 0 | 0 |
| 198 | 0 | 0 | 0 | 1 | 0 | 0 | 0 | 0 | 0 |
| 199 | 0 | 0 | 0 | 1 | 0 | 0 | 0 | 0 | 0 |
| 200 | 0 | 0 | 0 | 0 | 1 | 0 | 1 | 1 | 0 |
| 201 | 1 | 0 | 0 | 0 | 0 | 0 | 0 | 0 | 0 |
| 202 | 1 | 0 | 0 | 1 | 1 | 1 | 0 | 1 | 0 |
| 203 | 1 | 0 | 1 | 0 | 0 | 0 | 0 | 0 | 0 |
| 204 | 0 | 0 | 0 | 0 | 0 | 0 | 1 | 0 | 0 |
| 205 | 0 | 0 | 0 | 0 | 0 | 0 | 0 | 0 | 0 |
| 206 | 1 | 0 | 0 | 0 | 1 | 0 | 0 | 1 | 1 |
| 207 | 1 | 0 | 0 | 0 | 0 | 0 | 0 | 1 | 1 |
| 208 | 1 | 0 | 0 | 0 | 0 | 0 | 0 | 0 | 0 |
| 209 | 0 | 0 | 0 | 0 | 0 | 0 | 0 | 0 | 0 |
| 210 | 0 | 0 | 0 | 0 | 0 | 0 | 0 | 0 | 0 |
| 211 | 1 | 0 | 0 | 0 | 0 | 0 | 0 | 0 | 0 |
| 212 | 0 | 0 | 0 | 0 | 0 | 0 | 0 | 0 | 0 |
| 213 | 0 | 0 | 0 | 0 | 0 | 0 | 0 | 0 | 0 |
| 214 | 1 | 0 | 1 | 0 | 1 | 1 | 0 | 0 | 0 |
| 215 | 1 | 0 | 0 | 0 | 0 | 0 | 0 | 0 | 0 |
| 216 | 1 | 0 | 1 | 0 | 0 | 0 | 0 | 0 | 0 |
| 217 | 1 | 0 | 0 | 0 | 0 | 0 | 0 | 0 | 0 |
| 218 | 0 | 0 | 0 | 0 | 0 | 0 | 0 | 0 | 0 |
| 219 | 1 | 0 | 0 | 0 | 0 | 0 | 0 | 0 | 0 |
| 220 | 1 | 0 | 0 | 0 | 0 | 0 | 0 | 0 | 0 |
| 221 | 1 | 0 | 0 | 0 | 0 | 0 | 0 | 0 | 0 |
| 222 | 1 | 0 | 1 | 0 | 0 | 0 | 0 | 0 | 0 |
| 223 | 1 | 0 | 0 | 0 | 0 | 0 | 0 | 0 | 0 |

|     |   |   |   |   |   |   |   |   |   |
|-----|---|---|---|---|---|---|---|---|---|
| 224 | 0 | 0 | 0 | 0 | 0 | 0 | 0 | 0 | 0 |
| 225 | 1 | 0 | 0 | 0 | 0 | 0 | 0 | 0 | 0 |
| 226 | 1 | 0 | 0 | 0 | 0 | 0 | 0 | 0 | 0 |
| 227 | 1 | 0 | 0 | 0 | 0 | 0 | 0 | 0 | 0 |
| 228 | 0 | 0 | 0 | 0 | 0 | 0 | 0 | 0 | 0 |
| 229 | 0 | 0 | 0 | 0 | 0 | 0 | 0 | 0 | 0 |
| 230 | 1 | 0 | 0 | 0 | 0 | 0 | 0 | 0 | 0 |
| 231 | 0 | 0 | 0 | 0 | 1 | 0 | 0 | 0 | 0 |
| 232 | 1 | 0 | 0 | 1 | 0 | 1 | 1 | 0 | 0 |
| 233 | 1 | 1 | 0 | 0 | 0 | 0 | 1 | 0 | 0 |
| 234 | 1 | 1 | 0 | 0 | 0 | 0 | 1 | 0 | 0 |
| 235 | 1 | 1 | 0 | 0 | 0 | 0 | 1 | 1 | 0 |
| 236 | 1 | 1 | 1 | 1 | 0 | 0 | 0 | 1 | 0 |
| 237 | 1 | 0 | 0 | 1 | 0 | 0 | 1 | 1 | 0 |
| 238 | 0 | 0 | 0 | 1 | 0 | 0 | 1 | 1 | 0 |
| 239 | 0 | 0 | 0 | 0 | 0 | 0 | 0 | 0 | 0 |
| 240 | 1 | 1 | 0 | 1 | 0 | 0 | 0 | 1 | 0 |
| 241 | 1 | 0 | 1 | 0 | 1 | 0 | 1 | 0 | 0 |
| 242 | 1 | 0 | 0 | 0 | 1 | 1 | 1 | 1 | 0 |
| 243 | 1 | 0 | 1 | 1 | 1 | 0 | 0 | 0 | 0 |
| 244 | 1 | 0 | 0 | 1 | 1 | 1 | 0 | 0 | 0 |
| 245 | 1 | 0 | 1 | 1 | 1 | 0 | 1 | 0 | 0 |
| 246 | 1 | 0 | 1 | 0 | 1 | 0 | 1 | 0 | 0 |
| 247 | 1 | 0 | 1 | 1 | 1 | 1 | 1 | 0 | 0 |
| 248 | 0 | 0 | 1 | 1 | 0 | 0 | 0 | 0 | 0 |
| 249 | 1 | 0 | 0 | 0 | 1 | 1 | 0 | 0 | 0 |
| 250 | 1 | 0 | 1 | 1 | 1 | 0 | 1 | 0 | 0 |
| 251 | 0 | 0 | 1 | 0 | 1 | 0 | 0 | 0 | 0 |
| 252 | 1 | 0 | 0 | 0 | 0 | 0 | 0 | 0 | 0 |
| 253 | 1 | 0 | 0 | 1 | 1 | 0 | 0 | 0 | 0 |
| 254 | 1 | 0 | 0 | 1 | 0 | 0 | 0 | 0 | 0 |
| 255 | 1 | 0 | 0 | 0 | 0 | 0 | 1 | 0 | 0 |



|     |   |   |   |   |   |   |   |   |   |
|-----|---|---|---|---|---|---|---|---|---|
| 288 | 1 | 0 | 0 | 0 | 0 | 0 | 0 | 0 | 0 |
| 289 | 0 | 0 | 0 | 0 | 0 | 0 | 0 | 0 | 0 |
| 290 | 0 | 0 | 0 | 0 | 0 | 0 | 0 | 0 | 0 |
| 291 | 0 | 0 | 0 | 1 | 0 | 0 | 0 | 0 | 1 |
| 292 | 0 | 0 | 0 | 0 | 0 | 0 | 0 | 0 | 0 |
| 293 | 0 | 0 | 0 | 0 | 0 | 0 | 0 | 0 | 0 |
| 294 | 0 | 0 | 0 | 0 | 0 | 0 | 0 | 0 | 0 |
| 295 | 0 | 0 | 0 | 0 | 0 | 0 | 0 | 0 | 0 |
| 296 | 0 | 0 | 0 | 0 | 0 | 0 | 0 | 0 | 0 |
| 297 | 0 | 0 | 0 | 0 | 0 | 0 | 0 | 0 | 0 |
| 298 | 0 | 0 | 0 | 0 | 0 | 0 | 0 | 0 | 0 |
| 299 | 0 | 0 | 0 | 0 | 0 | 0 | 0 | 0 | 0 |
| 300 | 0 | 0 | 0 | 0 | 0 | 0 | 0 | 0 | 0 |
| 301 | 0 | 0 | 0 | 0 | 0 | 0 | 0 | 0 | 0 |
| 302 | 0 | 0 | 0 | 0 | 0 | 0 | 0 | 0 | 0 |
| 303 | 0 | 0 | 0 | 0 | 0 | 0 | 0 | 0 | 0 |
| 304 | 0 | 0 | 0 | 0 | 0 | 0 | 0 | 0 | 0 |
| 305 | 0 | 0 | 0 | 0 | 0 | 0 | 0 | 0 | 0 |
| 306 | 0 | 0 | 0 | 0 | 0 | 0 | 0 | 0 | 0 |
| 307 | 0 | 0 | 0 | 0 | 0 | 0 | 0 | 0 | 0 |
| 308 | 1 | 0 | 0 | 0 | 0 | 0 | 0 | 0 | 0 |
| 309 | 1 | 0 | 0 | 0 | 0 | 0 | 0 | 0 | 0 |
| 310 | 0 | 0 | 0 | 0 | 0 | 0 | 0 | 0 | 0 |
| 311 | 0 | 0 | 0 | 0 | 0 | 0 | 0 | 0 | 0 |
| 312 | 0 | 0 | 0 | 0 | 0 | 0 | 0 | 0 | 0 |
| 313 | 0 | 0 | 0 | 0 | 0 | 0 | 0 | 0 | 0 |
| 314 | 0 | 0 | 0 | 0 | 0 | 0 | 0 | 0 | 0 |
| 315 | 0 | 0 | 0 | 0 | 0 | 0 | 0 | 0 | 0 |
| 316 | 0 | 0 | 0 | 0 | 0 | 0 | 0 | 0 | 0 |
| 317 | 0 | 0 | 0 | 0 | 0 | 0 | 0 | 0 | 0 |
| 318 | 0 | 0 | 0 | 0 | 0 | 0 | 0 | 0 | 0 |
| 319 | 1 | 0 | 0 | 0 | 0 | 0 | 0 | 0 | 0 |





|     |   |   |   |   |   |   |   |   |   |
|-----|---|---|---|---|---|---|---|---|---|
| 352 | 1 | 0 | 0 | 0 | 0 | 0 | 0 | 0 | 0 |
| 353 | 1 | 0 | 0 | 0 | 0 | 0 | 0 | 0 | 0 |
| 354 | 1 | 0 | 0 | 0 | 0 | 0 | 0 | 0 | 0 |
| 355 | 1 | 0 | 0 | 0 | 0 | 0 | 0 | 0 | 0 |
| 356 | 1 | 0 | 0 | 0 | 0 | 0 | 0 | 0 | 0 |
| 357 | 1 | 0 | 0 | 0 | 0 | 0 | 0 | 0 | 0 |
| 358 | 1 | 0 | 0 | 0 | 0 | 0 | 0 | 0 | 0 |
| 359 | 0 | 0 | 0 | 0 | 0 | 0 | 0 | 0 | 0 |
| 360 | 0 | 0 | 0 | 0 | 0 | 0 | 0 | 0 | 0 |
| 361 | 0 | 0 | 0 | 0 | 0 | 0 | 0 | 0 | 0 |
| 362 | 0 | 0 | 0 | 0 | 0 | 0 | 0 | 0 | 0 |
| 363 | 1 | 0 | 0 | 0 | 0 | 0 | 0 | 0 | 0 |
| 364 | 0 | 0 | 0 | 0 | 0 | 0 | 0 | 0 | 0 |
| 365 | 0 | 0 | 0 | 0 | 0 | 0 | 0 | 0 | 0 |
| 366 | 0 | 0 | 0 | 0 | 0 | 0 | 0 | 0 | 0 |
| 367 | 0 | 0 | 0 | 0 | 0 | 0 | 0 | 0 | 0 |
| 368 | 1 | 0 | 1 | 0 | 0 | 0 | 0 | 0 | 1 |
| 369 | 0 | 0 | 0 | 0 | 0 | 0 | 0 | 0 | 0 |
| 370 | 0 | 0 | 0 | 0 | 0 | 0 | 0 | 0 | 0 |
| 371 | 0 | 0 | 0 | 0 | 0 | 0 | 0 | 0 | 0 |
| 372 | 0 | 0 | 0 | 0 | 0 | 0 | 0 | 0 | 0 |
| 373 | 1 | 0 | 0 | 0 | 0 | 0 | 0 | 0 | 0 |
| 374 | 0 | 0 | 0 | 0 | 0 | 0 | 0 | 0 | 0 |
| 375 | 0 | 0 | 0 | 0 | 0 | 0 | 0 | 0 | 0 |
| 376 | 0 | 0 | 0 | 0 | 0 | 0 | 0 | 0 | 0 |
| 377 | 0 | 0 | 0 | 0 | 0 | 0 | 0 | 0 | 0 |
| 378 | 0 | 0 | 0 | 0 | 0 | 0 | 0 | 0 | 0 |
| 379 | 0 | 0 | 0 | 0 | 0 | 0 | 0 | 0 | 0 |
| 380 | 1 | 1 | 0 | 0 | 0 | 0 | 0 | 0 | 0 |
| 381 | 0 | 0 | 0 | 0 | 0 | 0 | 0 | 0 | 0 |
| 382 | 0 | 0 | 1 | 0 | 0 | 1 | 0 | 0 | 1 |
| 383 | 1 | 0 | 0 | 0 | 0 | 0 | 0 | 0 | 0 |

|     |   |   |   |   |   |   |   |   |   |
|-----|---|---|---|---|---|---|---|---|---|
| 384 | 0 | 0 | 0 | 0 | 0 | 0 | 0 | 0 | 0 |
| 385 | 1 | 0 | 0 | 0 | 0 | 0 | 0 | 0 | 0 |
| 386 | 1 | 0 | 0 | 0 | 0 | 0 | 1 | 1 | 1 |
| 387 | 1 | 0 | 0 | 0 | 1 | 0 | 0 | 0 | 0 |
| 388 | 1 | 0 | 0 | 0 | 0 | 0 | 1 | 0 | 0 |
| 389 | 1 | 0 | 1 | 1 | 1 | 1 | 0 | 0 | 0 |
| 390 | 1 | 0 | 0 | 0 | 0 | 0 | 0 | 0 | 0 |
| 391 | 1 | 0 | 0 | 1 | 0 | 0 | 1 | 0 | 1 |
| 392 | 1 | 0 | 1 | 1 | 0 | 0 | 1 | 0 | 1 |
| 393 | 1 | 0 | 1 | 0 | 0 | 0 | 0 | 1 | 1 |
| 394 | 1 | 0 | 0 | 0 | 0 | 0 | 0 | 1 | 1 |
| 395 | 1 | 0 | 0 | 0 | 0 | 0 | 0 | 0 | 0 |
| 396 | 1 | 1 | 1 | 1 | 1 | 1 | 1 | 1 | 1 |
| 397 | 1 | 1 | 0 | 0 | 0 | 0 | 0 | 1 | 1 |
| 398 | 1 | 0 | 0 | 0 | 0 | 0 | 0 | 1 | 1 |
| 399 | 0 | 0 | 0 | 0 | 0 | 1 | 0 | 0 | 1 |
| 400 | 1 | 0 | 0 | 0 | 0 | 0 | 1 | 0 | 1 |

Intoxicating Substances

|                                                         |     |
|---------------------------------------------------------|-----|
| Betel Nut                                               | 159 |
| Betel Nut with lime (Process include extra use of lime) | 47  |
| Zarda Pan (Dried Betel nut)                             | 57  |
| Mitha Pan (Dried Betel nut)                             | 80  |
| Guthka (Processed Betel nut)                            | 66  |
| Sikhar (Processed Betel nut)                            | 41  |
| Smoking Tonacco                                         | 53  |
| Alcohol                                                 | 48  |
| Chewing Tobacco                                         | 24  |

Number of consumers

There are many individual consuming more than one intoxicating substances.
