# Supplementary material for: Bacteria in the oral cavity of individuals consuming intoxicating substances
Source: PubMed Central journal article supplement (PMC10218728; doi:10.1371/journal.pone.0285753), 2023-05-26
Supplement: pone.0285753.s003.pdf [file pone.0285753.s003.pdf]

**S3-Table: Record on the pattern of consumption (i.e., number of time consumption, daily/weekly/ monthly) and the total duration of consumption of the intoxicating substances along with their oral hygiene.**

| PARTICIPANT ID | DAILY (D) /WEEKLY (W)/ MONTHLY (M) CONSUMPTION |   |   |                                                    |   |   |                            |   |   |                            |   |   |                              |   |   |                              |   |   |                 |   |   |         |   |   |                 |   |   | CONSUMING SINCE (YEARS) | LEAVING CONSUMPTION |        | BRUSH (NO/DAY) |   |   |
|----------------|------------------------------------------------|---|---|----------------------------------------------------|---|---|----------------------------|---|---|----------------------------|---|---|------------------------------|---|---|------------------------------|---|---|-----------------|---|---|---------|---|---|-----------------|---|---|-------------------------|---------------------|--------|----------------|---|---|
|                | BETEL NUT                                      |   |   | BETEL NUT LIME (PROCESS INCLUDE EXTRA USE OF LIME) |   |   | ZARDAPAN (DRIED BETEL NUT) |   |   | MITHAPAN (DRIED BETEL NUT) |   |   | GUTHKA (PROCESSED BETEL NUT) |   |   | SIKHAR (PROCESSED BETEL NUT) |   |   | SMOKING TOBACCO |   |   | ALCOHOL |   |   | CHEWING TABACCO |   |   |                         | YEARS               | MONTHS |                |   |   |
|                | D                                              | W | M | D                                                  | W | M | D                          | W | M | D                          | W | M | D                            | W | M | D                            | W | M | D               | W | M | D       | W | M | D               | W | M |                         |                     |        |                |   |   |
| 101            | 1                                              | 0 | 0 | 1                                                  | 0 | 0 | 0                          | 1 | 0 | 0                          | 0 | 0 | 0                            | 0 | 0 | 0                            | 0 | 0 | 0               | 0 | 0 | 0       | 0 | 0 | 0               | 0 | 0 | 0                       | 20                  | 0      | 0              | 1 |   |
| 102            | 0                                              | 0 | 1 | 0                                                  | 3 | 0 | 0                          | 0 | 0 | 0                          | 0 | 0 | 0                            | 1 | 0 | 0                            | 0 | 0 | 0               | 0 | 0 | 0       | 0 | 0 | 0               | 0 | 0 | 0                       | 10                  | 0      | 0              | 1 |   |
| 103            | 0                                              | 0 | 0 | 0                                                  | 0 | 0 | 0                          | 0 | 0 | 0                          | 0 | 0 | 0                            | 0 | 0 | 0                            | 0 | 0 | 0               | 0 | 0 | 0       | 0 | 0 | 0               | 1 | 0 | 0                       | 0                   | 10     | 0              | 0 | 1 |
| 104            | 2                                              | 0 | 0 | 0                                                  | 0 | 0 | 0                          | 0 | 0 | 0                          | 1 | 0 | 0                            | 0 | 0 | 0                            | 0 | 0 | 0               | 0 | 0 | 0       | 0 | 0 | 0               | 0 | 0 | 0                       | 6                   | 0      | 0              | 2 |   |
| 105            | 0                                              | 1 | 0 | 0                                                  | 0 | 0 | 0                          | 0 | 0 | 0                          | 0 | 0 | 0                            | 0 | 0 | 0                            | 0 | 0 | 0               | 0 | 0 | 0       | 0 | 0 | 0               | 0 | 0 | 0                       | 1                   | 0      | 0              | 2 |   |
| 106            | 0                                              | 0 | 0 | 0                                                  | 0 | 0 | 0                          | 0 | 0 | 0                          | 0 | 0 | 0                            | 0 | 0 | 0                            | 0 | 0 | 0               | 0 | 0 | 0       | 0 | 0 | 0               | 0 | 0 | 0                       | 0                   | 0      | 0              | 1 |   |
| 107            | 0                                              | 0 | 0 | 0                                                  | 0 | 0 | 0                          | 0 | 0 | 0                          | 0 | 0 | 0                            | 0 | 0 | 0                            | 0 | 0 | 0               | 0 | 0 | 0       | 0 | 0 | 0               | 0 | 0 | 0                       | 0                   | 0      | 0              | 1 |   |
| 108            | 0                                              | 0 | 0 | 0                                                  | 0 | 0 | 0                          | 0 | 0 | 0                          | 0 | 0 | 0                            | 0 | 0 | 0                            | 0 | 0 | 0               | 0 | 0 | 0       | 0 | 0 | 0               | 0 | 0 | 0                       | 0                   | 0      | 0              | 2 |   |
| 109            | 0                                              | 0 | 0 | 0                                                  | 0 | 0 | 0                          | 3 | 0 | 0                          | 3 | 0 | 0                            | 0 | 0 | 0                            | 0 | 0 | 0               | 1 | 0 | 0       | 0 | 0 | 0               | 0 | 0 | 0                       | 15                  | 0      | 0              | 2 |   |
| 110            | 0                                              | 0 | 2 | 0                                                  | 0 | 0 | 0                          | 0 | 0 | 0                          | 0 | 2 | 0                            | 0 | 3 | 0                            | 0 | 1 | 0               | 1 | 0 | 0       | 0 | 2 | 0               | 0 | 0 | 15                      | 0                   | 0      | 1              |   |   |
| 111            | 0                                              | 0 | 1 | 0                                                  | 0 | 0 | 0                          | 0 | 0 | 0                          | 0 | 1 | 0                            | 0 | 0 | 0                            | 0 | 0 | 0               | 0 | 0 | 0       | 0 | 0 | 0               | 0 | 0 | 8                       | 0                   | 0      | 1              |   |   |
| 112            | 6                                              | 0 | 0 | 0                                                  | 0 | 0 | 0                          | 0 | 0 | 0                          | 0 | 0 | 0                            | 0 | 0 | 0                            | 0 | 0 | 1               | 0 | 0 | 0       | 0 | 0 | 0               | 0 | 0 | 2                       | 0                   | 8      | 2              |   |   |
| 113            | 1                                              | 0 | 0 | 0                                                  | 0 | 0 | 0                          | 0 | 0 | 0                          | 0 | 2 | 0                            | 0 | 0 | 0                            | 0 | 0 | 0               | 0 | 0 | 0       | 0 | 0 | 0               | 0 | 0 | 16                      | 0                   | 0      | 1              |   |   |
| 114            | 2                                              | 0 | 0 | 1                                                  | 0 | 0 | 0                          | 0 | 1 | 0                          | 0 | 0 | 5                            | 0 | 0 | 5                            | 0 | 0 | 0               | 0 | 0 | 0       | 0 | 0 | 1               | 0 | 0 | 4                       | 0                   | 0      | 2              |   |   |
| 115            | 0                                              | 1 | 0 | 0                                                  | 0 | 0 | 0                          | 0 | 0 | 0                          | 0 | 1 | 0                            | 0 | 0 | 0                            | 0 | 0 | 0               | 1 | 0 | 0       | 0 | 0 | 0               | 0 | 0 | 14                      | 0                   | 0      | 1              |   |   |
| 116            | 2                                              | 0 | 0 | 1                                                  | 0 | 0 | 0                          | 0 | 0 | 0                          | 0 | 0 | 0                            | 0 | 0 | 0                            | 0 | 0 | 0               | 3 | 0 | 0       | 0 | 0 | 0               | 0 | 0 | 3                       | 0                   | 6      | 2              |   |   |
| 117            | 0                                              | 0 | 0 | 0                                                  | 0 | 0 | 0                          | 0 | 0 | 0                          | 0 | 1 | 0                            | 0 | 0 | 0                            | 0 | 0 | 1               | 0 | 0 | 0       | 0 | 0 | 0               | 0 | 0 | 7                       | 0                   | 5      | 1              |   |   |
| 118            | 3                                              | 0 | 0 | 0                                                  | 2 | 0 | 0                          | 1 | 0 | 0                          | 0 | 1 | 0                            | 2 | 0 | 0                            | 2 | 0 | 5               | 0 | 0 | 0       | 2 | 0 | 0               | 0 | 0 | 8                       | 0                   | 0      | 1              |   |   |
| 119            | 0                                              | 2 | 0 | 0                                                  | 0 | 0 | 0                          | 0 | 1 | 0                          | 0 | 1 | 0                            | 0 | 0 | 0                            | 0 | 0 | 0               | 0 | 0 | 0       | 0 | 0 | 0               | 0 | 0 | 4                       | 0                   | 0      | 1              |   |   |
| 120            | 5                                              | 0 | 0 | 0                                                  | 0 | 0 | 0                          | 0 | 0 | 0                          | 0 | 1 | 0                            | 0 | 0 | 0                            | 0 | 0 | 0               | 0 | 0 | 0       | 0 | 0 | 0               | 0 | 0 | 15                      | 0                   | 0      | 2              |   |   |
| 121            | 0                                              | 0 | 0 | 0                                                  | 0 | 0 | 0                          | 0 | 0 | 0                          | 1 | 0 | 0                            | 0 | 0 | 0                            | 1 | 0 | 0               | 1 | 0 | 0       | 0 | 3 | 0               | 0 | 0 | 4                       | 0                   | 0      | 2              |   |   |
| 122            | 0                                              | 0 | 0 | 0                                                  | 0 | 0 | 0                          | 0 | 0 | 0                          | 0 | 0 | 0                            | 0 | 0 | 0                            | 0 | 0 | 0               | 0 | 0 | 0       | 0 | 0 | 0               | 0 | 0 | 0                       | 0                   | 0      | 1              |   |   |
| 123            | 0                                              | 0 | 3 | 0                                                  | 0 | 1 | 0                          | 2 | 0 | 0                          | 0 | 1 | 1                            | 0 | 0 | 1                            | 0 | 0 | 0               | 1 | 0 | 0       | 3 | 0 | 0               | 0 | 0 | 5                       | 0                   | 0      | 1              |   |   |
| 124            | 0                                              | 0 | 0 | 0                                                  | 0 | 0 | 0                          | 0 | 0 | 0                          | 0 | 0 | 0                            | 0 | 0 | 0                            | 0 | 0 | 0               | 0 | 0 | 0       | 0 | 0 | 0               | 1 | 0 | 2                       | 0                   | 1      | 2              |   |   |



|     |               |   |   |               |   |   |               |   |   |   |   |   |               |   |   |   |   |   |   |   |   |   |   |   |   |   |   |    |    |   |    |   |   |   |
|-----|---------------|---|---|---------------|---|---|---------------|---|---|---|---|---|---------------|---|---|---|---|---|---|---|---|---|---|---|---|---|---|----|----|---|----|---|---|---|
| 157 | 0             | 0 | 0 | 0             | 0 | 0 | 0             | 0 | 0 | 0 | 0 | 1 | 0             | 0 | 0 | 0 | 0 | 0 | 0 | 0 | 0 | 0 | 0 | 0 | 0 | 0 | 0 | 0  | 0  | 0 | 10 | 1 | 0 | 1 |
| 158 | 0             | 0 | 0 | 0             | 0 | 0 | 0             | 0 | 0 | 0 | 1 | 0 | 0             | 0 | 0 | 0 | 0 | 0 | 0 | 0 | 0 | 0 | 0 | 0 | 0 | 0 | 0 | 0  | 0  | 0 | 3  | 0 | 0 | 2 |
| 159 | 0             | 0 | 0 | 0             | 0 | 1 | 0             | 0 | 0 | 0 | 0 | 0 | 0             | 3 | 0 | 0 | 0 | 0 | 0 | 0 | 0 | 0 | 0 | 0 | 0 | 0 | 0 | 0  | 0  | 1 | 0  | 0 | 2 |   |
| 160 | 0             | 0 | 0 | 0             | 0 | 0 | 0             | 0 | 0 | 0 | 0 | 0 | 0             | 4 | 0 | 0 | 0 | 0 | 0 | 0 | 0 | 0 | 0 | 0 | 0 | 0 | 0 | 0  | 0  | 2 | 0  | 0 | 2 |   |
| 161 | 5             | 0 | 0 | 5             | 0 | 0 | 0             | 0 | 0 | 2 | 0 | 0 | 2             | 0 | 0 | 0 | 0 | 0 | 0 | 0 | 0 | 0 | 1 | 0 | 0 | 0 | 0 | 0  | 35 | 0 | 0  | 2 |   |   |
| 162 | 0             | 0 | 0 | 0             | 0 | 0 | 0             | 0 | 0 | 0 | 0 | 0 | $\frac{1}{2}$ | 0 | 0 | 0 | 0 | 0 | 0 | 0 | 0 | 1 | 0 | 0 | 0 | 0 | 0 | 0  | 24 | 0 | 6  | 2 |   |   |
| 163 | $\frac{1}{0}$ | 0 | 0 | 7             | 0 | 0 | 0             | 0 | 2 | 0 | 0 | 0 | 0             | 0 | 0 | 0 | 0 | 0 | 0 | 0 | 0 | 0 | 5 | 0 | 0 | 0 | 0 | 0  | 8  | 0 | 0  | 2 |   |   |
| 164 | 2             | 0 | 0 | 2             | 0 | 0 | 0             | 0 | 0 | 0 | 0 | 0 | 0             | 0 | 0 | 0 | 0 | 0 | 0 | 0 | 0 | 0 | 0 | 0 | 0 | 0 | 0 | 0  | 10 | 0 | 0  | 2 |   |   |
| 165 | 8             | 0 | 0 | 8             | 0 | 0 | 0             | 0 | 0 | 0 | 0 | 0 | 0             | 0 | 0 | 0 | 0 | 0 | 0 | 0 | 0 | 0 | 0 | 0 | 0 | 0 | 0 | 0  | 50 | 0 | 1  | 2 |   |   |
| 166 | 0             | 3 | 0 | 0             | 0 | 0 | 0             | 0 | 0 | 0 | 0 | 0 | 0             | 0 | 0 | 0 | 0 | 0 | 0 | 0 | 0 | 0 | 0 | 0 | 0 | 0 | 0 | 9  | 0  | 0 | 1  |   |   |   |
| 167 | 1             | 0 | 0 | 0             | 0 | 0 | 0             | 0 | 0 | 0 | 0 | 0 | 0             | 0 | 0 | 0 | 0 | 0 | 0 | 0 | 0 | 1 | 0 | 0 | 0 | 0 | 0 | 17 | 0  | 0 | 2  |   |   |   |
| 168 | 4             | 0 | 0 | 4             | 0 | 0 | 0             | 0 | 0 | 0 | 0 | 0 | 0             | 0 | 0 | 0 | 0 | 0 | 0 | 0 | 0 | 0 | 0 | 0 | 0 | 0 | 0 | 30 | 0  | 0 | 2  |   |   |   |
| 169 | 6             | 0 | 0 | 6             | 0 | 0 | 0             | 0 | 0 | 0 | 0 | 0 | 0             | 0 | 0 | 0 | 0 | 0 | 0 | 0 | 0 | 0 | 0 | 0 | 0 | 0 | 0 | 20 | 0  | 0 | 2  |   |   |   |
| 170 | 6             | 0 | 0 | 6             | 0 | 0 | 1             | 0 | 0 | 0 | 0 | 0 | 0             | 0 | 0 | 0 | 0 | 0 | 0 | 0 | 0 | 0 | 0 | 0 | 0 | 0 | 0 | 34 | 5  | 0 | 2  |   |   |   |
| 171 | 5             | 0 | 0 | 5             | 0 | 0 | 0             | 0 | 0 | 0 | 0 | 0 | 0             | 0 | 0 | 0 | 0 | 0 | 0 | 0 | 0 | 0 | 0 | 0 | 0 | 0 | 0 | 29 | 0  | 6 | 2  |   |   |   |
| 172 | 4             | 0 | 0 | 4             | 0 | 0 | 0             | 0 | 0 | 0 | 0 | 0 | 0             | 0 | 0 | 0 | 0 | 0 | 0 | 0 | 0 | 0 | 0 | 0 | 0 | 0 | 0 | 3  | 0  | 0 | 2  |   |   |   |
| 173 | 4             | 0 | 0 | 4             | 0 | 0 | 0             | 0 | 0 | 0 | 0 | 0 | 0             | 0 | 0 | 0 | 0 | 0 | 0 | 0 | 0 | 0 | 0 | 0 | 0 | 0 | 0 | 10 | 0  | 0 | 1  |   |   |   |
| 174 | $\frac{1}{0}$ | 0 | 0 | $\frac{1}{0}$ | 0 | 0 | 0             | 0 | 0 | 0 | 0 | 0 | 0             | 0 | 0 | 0 | 0 | 0 | 0 | 0 | 0 | 0 | 0 | 0 | 0 | 0 | 0 | 0  | 12 | 0 | 0  | 2 |   |   |
| 175 | 3             | 0 | 0 | 3             | 0 | 0 | 0             | 0 | 1 | 0 | 0 | 0 | 0             | 0 | 0 | 0 | 0 | 0 | 0 | 0 | 0 | 0 | 0 | 0 | 0 | 0 | 0 | 0  | 10 | 0 | 0  | 2 |   |   |
| 176 | 2             | 0 | 0 | 2             | 0 | 0 | 0             | 0 | 0 | 0 | 0 | 1 | 0             | 0 | 0 | 0 | 0 | 0 | 0 | 0 | 0 | 0 | 0 | 0 | 0 | 0 | 0 | 2  | 0  | 0 | 2  |   |   |   |
| 177 | 8             | 0 | 0 | 8             | 0 | 0 | 0             | 0 | 0 | 0 | 0 | 0 | 0             | 0 | 0 | 0 | 0 | 0 | 0 | 0 | 0 | 0 | 0 | 0 | 0 | 0 | 0 | 30 | 0  | 0 | 2  |   |   |   |
| 178 | 6             | 0 | 0 | 6             | 0 | 0 | 0             | 0 | 1 | 0 | 0 | 0 | 0             | 0 | 0 | 0 | 0 | 0 | 0 | 0 | 0 | 0 | 0 | 0 | 0 | 0 | 0 | 22 | 0  | 0 | 3  |   |   |   |
| 179 | $\frac{1}{0}$ | 0 | 0 | $\frac{1}{0}$ | 0 | 0 | $\frac{1}{0}$ | 0 | 0 | 0 | 0 | 0 | 0             | 0 | 0 | 0 | 0 | 0 | 0 | 0 | 0 | 0 | 0 | 0 | 0 | 0 | 0 | 22 | 0  | 0 | 2  |   |   |   |
| 180 | 7             | 0 | 0 | 7             | 0 | 0 | 0             | 0 | 0 | 0 | 0 | 0 | 0             | 0 | 0 | 0 | 0 | 0 | 0 | 0 | 0 | 1 | 0 | 0 | 0 | 0 | 0 | 40 | 0  | 0 | 1  |   |   |   |
| 181 | 0             | 0 | 0 | 0             | 0 | 0 | 0             | 0 | 0 | 0 | 0 | 1 | 0             | 0 | 1 | 0 | 0 | 0 | 0 | 0 | 0 | 0 | 0 | 0 | 0 | 0 | 0 | 2  | 0  | 0 | 1  |   |   |   |
| 182 | 0             | 0 | 0 | 0             | 0 | 0 | 0             | 0 | 0 | 0 | 0 | 0 | 3             | 0 | 0 | 3 | 0 | 0 | 0 | 0 | 0 | 0 | 0 | 0 | 0 | 0 | 0 | 6  | 0  | 1 | 1  |   |   |   |
| 183 | 3             | 0 | 0 | 0             | 0 | 0 | 0             | 0 | 0 | 0 | 0 | 0 | 0             | 0 | 0 | 0 | 0 | 0 | 0 | 0 | 0 | 0 | 0 | 0 | 0 | 0 | 0 | 2  | 0  | 3 | 1  |   |   |   |
| 184 | 0             | 0 | 0 | 0             | 0 | 0 | 0             | 0 | 0 | 0 | 0 | 0 | 0             | 0 | 0 | 0 | 0 | 0 | 0 | 0 | 0 | 0 | 0 | 0 | 0 | 0 | 0 | 0  | 0  | 0 | 1  |   |   |   |
| 185 | 3             | 0 | 0 | 0             | 0 | 0 | 0             | 0 | 0 | 0 | 0 | 0 | 8             | 0 | 0 | 0 | 0 | 0 | 0 | 0 | 0 | 0 | 0 | 0 | 0 | 0 | 0 | 2  | 0  | 2 | 1  |   |   |   |
| 186 | 6             | 0 | 0 | 0             | 0 | 0 | 0             | 2 | 0 | 0 | 0 | 0 | 2             | 0 | 0 | 2 | 0 | 0 | 0 | 0 | 0 | 0 | 0 | 0 | 0 | 0 | 0 | 5  | 0  | 0 | 1  |   |   |   |

|     |        |   |   |   |   |   |        |   |   |   |   |        |   |   |   |   |   |   |        |   |   |   |        |        |    |    |    |   |   |   |   |   |   |    |   |   |   |
|-----|--------|---|---|---|---|---|--------|---|---|---|---|--------|---|---|---|---|---|---|--------|---|---|---|--------|--------|----|----|----|---|---|---|---|---|---|----|---|---|---|
| 187 | 0      | 0 | 0 | 0 | 0 | 0 | 0      | 0 | 0 | 0 | 0 | 0      | 3 | 0 | 0 | 0 | 0 | 0 | 0      | 0 | 0 | 0 | 0      | 0      | 0  | 0  | 0  | 0 | 0 | 0 | 0 | 0 | 0 | 12 | 0 | 0 | 1 |
| 188 | 3      | 0 | 0 | 0 | 0 | 0 | 0      | 0 | 3 | 0 | 0 | 0      | 1 | 0 | 0 | 0 | 3 | 0 | 0      | 0 | 0 | 0 | 0      | 4      | 0  | 0  | 17 | 0 | 5 | 1 |   |   |   |    |   |   |   |
| 189 | 0      | 0 | 1 | 0 | 0 | 0 | 0      | 0 | 0 | 0 | 0 | 0      | 0 | 0 | 0 | 0 | 0 | 0 | 0      | 0 | 0 | 0 | 1      | 0      | 0  | 10 | 0  | 0 | 2 |   |   |   |   |    |   |   |   |
| 190 | 0      | 0 | 0 | 0 | 0 | 0 | 0      | 0 | 0 | 0 | 0 | 0      | 5 | 0 | 0 | 5 | 0 | 0 | 0      | 0 | 0 | 0 | 6      | 0      | 0  | 5  | 0  | 0 | 2 |   |   |   |   |    |   |   |   |
| 191 | 1<br>0 | 0 | 0 | 0 | 0 | 0 | 0      | 1 | 0 | 0 | 0 | 0      | 3 | 0 | 0 | 0 | 0 | 0 | 0      | 0 | 0 | 0 | 1<br>0 | 0      | 0  | 30 | 0  | 0 | 1 |   |   |   |   |    |   |   |   |
| 192 | 0      | 0 | 0 | 0 | 0 | 0 | 3      | 0 | 0 | 0 | 0 | 7      | 0 | 0 | 0 | 0 | 0 | 0 | 0      | 0 | 0 | 5 | 0      | 1<br>0 | 5  | 0  | 30 | 0 | 0 | 1 |   |   |   |    |   |   |   |
| 193 | 0      | 0 | 0 | 0 | 0 | 0 | 2      | 0 | 0 | 0 | 0 | 0      | 0 | 0 | 0 | 0 | 0 | 0 | 0      | 0 | 0 | 0 | 0      | 0      | 1  | 0  | 0  | 2 |   |   |   |   |   |    |   |   |   |
| 194 | 0      | 0 | 0 | 0 | 0 | 0 | 1      | 0 | 0 | 0 | 0 | 6      | 0 | 0 | 6 | 0 | 0 | 0 | 0      | 0 | 0 | 2 | 0      | 0      | 4  | 0  | 0  | 2 |   |   |   |   |   |    |   |   |   |
| 195 | 0      | 0 | 0 | 0 | 0 | 0 | 0      | 0 | 0 | 0 | 0 | 0      | 0 | 0 | 0 | 0 | 0 | 0 | 0      | 0 | 0 | 0 | 0      | 0      | 0  | 0  | 0  | 0 | 1 |   |   |   |   |    |   |   |   |
| 196 | 0      | 0 | 0 | 0 | 0 | 0 | 0      | 0 | 0 | 4 | 0 | 3<br>2 | 0 | 0 | 0 | 0 | 0 | 0 | 0      | 0 | 3 | 0 | 0      | 0      | 8  | 0  | 3  | 1 |   |   |   |   |   |    |   |   |   |
| 197 | 3      | 0 | 0 | 0 | 0 | 0 | 0      | 0 | 0 | 0 | 2 | 0      | 0 | 0 | 0 | 0 | 0 | 0 | 0      | 0 | 0 | 0 | 0      | 0      | 15 | 1  | 0  | 1 |   |   |   |   |   |    |   |   |   |
| 198 | 0      | 0 | 0 | 0 | 0 | 0 | 0      | 0 | 0 | 0 | 1 | 0      | 0 | 0 | 0 | 0 | 0 | 0 | 0      | 0 | 0 | 0 | 0      | 0      | 0  | 0  | 0  | 1 |   |   |   |   |   |    |   |   |   |
| 199 | 0      | 0 | 0 | 0 | 0 | 0 | 0      | 0 | 0 | 0 | 1 | 0      | 0 | 0 | 0 | 0 | 0 | 0 | 0      | 0 | 0 | 0 | 0      | 0      | 0  | 0  | 0  | 1 |   |   |   |   |   |    |   |   |   |
| 200 | 0      | 0 | 0 | 0 | 0 | 0 | 0      | 0 | 0 | 0 | 0 | 1      | 0 | 0 | 0 | 0 | 5 | 0 | 0      | 0 | 0 | 1 | 0      | 0      | 20 | 0  | 0  | 1 |   |   |   |   |   |    |   |   |   |
| 201 | 2      | 0 | 0 | 0 | 0 | 0 | 0      | 0 | 0 | 0 | 0 | 0      | 0 | 0 | 0 | 0 | 0 | 0 | 0      | 0 | 0 | 0 | 0      | 0      | 50 | 0  | 0  | 1 |   |   |   |   |   |    |   |   |   |
| 202 | 2      | 0 | 0 | 0 | 0 | 0 | 0      | 0 | 0 | 0 | 1 | 1      | 0 | 0 | 1 | 0 | 0 | 0 | 0      | 0 | 0 | 1 | 0      | 0      | 5  | 0  | 0  | 2 |   |   |   |   |   |    |   |   |   |
| 203 | 1<br>0 | 0 | 0 | 0 | 0 | 0 | 1<br>0 | 0 | 0 | 0 | 0 | 0      | 0 | 0 | 0 | 0 | 0 | 0 | 0      | 0 | 0 | 0 | 0      | 0      | 18 | 0  | 0  | 2 |   |   |   |   |   |    |   |   |   |
| 204 | 0      | 0 | 0 | 0 | 0 | 0 | 0      | 0 | 0 | 0 | 0 | 0      | 0 | 0 | 0 | 0 | 0 | 0 | 3<br>5 | 0 | 0 | 0 | 0      | 0      | 18 | 0  | 2  | 1 |   |   |   |   |   |    |   |   |   |
| 205 | 0      | 0 | 0 | 0 | 0 | 0 | 0      | 0 | 0 | 0 | 0 | 0      | 0 | 0 | 0 | 0 | 0 | 0 | 0      | 0 | 0 | 0 | 0      | 0      | 0  | 0  | 0  | 1 |   |   |   |   |   |    |   |   |   |
| 206 | 1<br>0 | 0 | 0 | 0 | 0 | 0 | 0      | 0 | 0 | 0 | 0 | 1<br>0 | 0 | 0 | 0 | 0 | 0 | 0 | 0      | 0 | 1 | 0 | 0      | 1<br>4 | 0  | 10 | 0  | 0 | 1 |   |   |   |   |    |   |   |   |
| 207 | 3      | 0 | 0 | 0 | 0 | 0 | 0      | 0 | 0 | 0 | 0 | 0      | 0 | 0 | 0 | 0 | 0 | 0 | 0      | 0 | 0 | 3 | 3      | 0      | 10 | 0  | 0  | 3 |   |   |   |   |   |    |   |   |   |
| 208 | 3      | 0 | 0 | 0 | 0 | 0 | 0      | 0 | 0 | 0 | 0 | 0      | 0 | 0 | 0 | 0 | 0 | 0 | 0      | 0 | 0 | 0 | 0      | 0      | 15 | 0  | 0  | 2 |   |   |   |   |   |    |   |   |   |
| 209 | 0      | 0 | 0 | 0 | 0 | 0 | 0      | 0 | 0 | 0 | 0 | 0      | 0 | 0 | 0 | 0 | 0 | 0 | 0      | 0 | 0 | 0 | 0      | 0      | 0  | 0  | 0  | 1 |   |   |   |   |   |    |   |   |   |
| 210 | 0      | 0 | 0 | 0 | 0 | 0 | 0      | 0 | 0 | 0 | 0 | 0      | 0 | 0 | 0 | 0 | 0 | 0 | 0      | 0 | 0 | 0 | 0      | 0      | 0  | 0  | 0  | 2 |   |   |   |   |   |    |   |   |   |
| 211 | 1<br>0 | 0 | 0 | 0 | 0 | 0 | 0      | 0 | 0 | 0 | 0 | 0      | 0 | 0 | 0 | 0 | 0 | 0 | 0      | 0 | 0 | 0 | 0      | 0      | 10 | 0  | 0  | 2 |   |   |   |   |   |    |   |   |   |
| 212 | 0      | 0 | 0 | 0 | 0 | 0 | 0      | 0 | 0 | 0 | 0 | 0      | 0 | 0 | 0 | 0 | 0 | 0 | 0      | 0 | 0 | 0 | 0      | 0      | 0  | 0  | 0  | 2 |   |   |   |   |   |    |   |   |   |
| 213 | 0      | 0 | 0 | 0 | 0 | 0 | 0      | 0 | 0 | 0 | 0 | 0      | 0 | 0 | 0 | 0 | 0 | 0 | 0      | 0 | 0 | 0 | 0      | 0      | 0  | 0  | 0  | 2 |   |   |   |   |   |    |   |   |   |
| 214 | 2      | 0 | 0 | 0 | 0 | 0 | 0      | 1 | 0 | 0 | 0 | 0      | 2 | 0 | 0 | 2 | 0 | 0 | 0      | 0 | 0 | 0 | 0      | 0      | 1  | 0  | 0  | 1 |   |   |   |   |   |    |   |   |   |

|     |        |   |   |        |   |   |        |   |   |   |   |   |   |        |   |   |        |   |   |        |   |   |   |   |   |   |   |   |   |   |   |   |   |   |   |   |    |   |    |   |    |    |    |    |   |   |   |
|-----|--------|---|---|--------|---|---|--------|---|---|---|---|---|---|--------|---|---|--------|---|---|--------|---|---|---|---|---|---|---|---|---|---|---|---|---|---|---|---|----|---|----|---|----|----|----|----|---|---|---|
| 215 | 3      | 0 | 0 | 0      | 0 | 0 | 0      | 0 | 0 | 0 | 0 | 0 | 0 | 0      | 0 | 0 | 0      | 0 | 0 | 0      | 0 | 0 | 0 | 0 | 0 | 0 | 0 | 0 | 0 | 0 | 0 | 0 | 0 | 0 | 0 | 0 | 10 | 0 | 0  | 1 |    |    |    |    |   |   |   |
| 216 | 1<br>0 | 0 | 0 | 0      | 0 | 0 | 1<br>0 | 0 | 0 | 0 | 0 | 0 | 0 | 0      | 0 | 0 | 0      | 0 | 0 | 0      | 0 | 0 | 0 | 0 | 0 | 0 | 0 | 0 | 0 | 0 | 0 | 0 | 0 | 0 | 0 | 0 | 0  | 0 | 40 | 0 | 0  | 1  |    |    |   |   |   |
| 217 | 2      | 0 | 0 | 0      | 0 | 0 | 0      | 0 | 0 | 0 | 0 | 0 | 0 | 0      | 0 | 0 | 0      | 0 | 0 | 0      | 0 | 0 | 0 | 0 | 0 | 0 | 0 | 0 | 0 | 0 | 0 | 0 | 0 | 0 | 0 | 0 | 0  | 0 | 8  | 0 | 0  | 1  |    |    |   |   |   |
| 218 | 0      | 0 | 0 | 0      | 0 | 0 | 0      | 0 | 0 | 0 | 0 | 0 | 0 | 0      | 0 | 0 | 0      | 0 | 0 | 0      | 0 | 0 | 0 | 0 | 0 | 0 | 0 | 0 | 0 | 0 | 0 | 0 | 0 | 0 | 0 | 0 | 0  | 0 | 0  | 0 | 1  |    |    |    |   |   |   |
| 219 | 1      | 0 | 0 | 0      | 0 | 0 | 0      | 0 | 0 | 0 | 0 | 0 | 0 | 0      | 0 | 0 | 0      | 0 | 0 | 0      | 0 | 0 | 0 | 0 | 0 | 0 | 0 | 0 | 0 | 0 | 0 | 0 | 0 | 0 | 0 | 0 | 0  | 0 | 5  | 0 | 0  | 2  |    |    |   |   |   |
| 220 | 1      | 0 | 0 | 0      | 0 | 0 | 0      | 0 | 0 | 0 | 0 | 0 | 0 | 0      | 0 | 0 | 0      | 0 | 0 | 0      | 0 | 0 | 0 | 0 | 0 | 0 | 0 | 0 | 0 | 0 | 0 | 0 | 0 | 0 | 0 | 0 | 0  | 0 | 0  | 2 | 0  | 0  | 1  |    |   |   |   |
| 221 | 2      | 0 | 0 | 0      | 0 | 0 | 0      | 0 | 0 | 0 | 0 | 0 | 0 | 0      | 0 | 0 | 0      | 0 | 0 | 0      | 0 | 0 | 0 | 0 | 0 | 0 | 0 | 0 | 0 | 0 | 0 | 0 | 0 | 0 | 0 | 0 | 0  | 0 | 0  | 4 | 0  | 0  | 1  |    |   |   |   |
| 222 | 1<br>0 | 0 | 0 | 0      | 0 | 0 | 1<br>0 | 0 | 0 | 0 | 0 | 0 | 0 | 0      | 0 | 0 | 0      | 0 | 0 | 0      | 0 | 0 | 0 | 0 | 0 | 0 | 0 | 0 | 0 | 0 | 0 | 0 | 0 | 0 | 0 | 0 | 0  | 0 | 0  | 0 | 10 | 0  | 0  | 3  |   |   |   |
| 223 | 1      | 0 | 0 | 0      | 0 | 0 | 0      | 0 | 0 | 0 | 0 | 0 | 0 | 0      | 0 | 0 | 0      | 0 | 0 | 0      | 0 | 0 | 0 | 0 | 0 | 0 | 0 | 0 | 0 | 0 | 0 | 0 | 0 | 0 | 0 | 0 | 0  | 0 | 0  | 0 | 1  | 0  | 0  | 1  |   |   |   |
| 224 | 0      | 0 | 0 | 0      | 0 | 0 | 0      | 0 | 0 | 0 | 0 | 0 | 0 | 0      | 0 | 0 | 0      | 0 | 0 | 0      | 0 | 0 | 0 | 0 | 0 | 0 | 0 | 0 | 0 | 0 | 0 | 0 | 0 | 0 | 0 | 0 | 0  | 0 | 0  | 0 | 0  | 0  | 1  |    |   |   |   |
| 225 | 2      | 0 | 0 | 0      | 0 | 0 | 0      | 0 | 0 | 0 | 0 | 0 | 0 | 0      | 0 | 0 | 0      | 0 | 0 | 0      | 0 | 0 | 0 | 0 | 0 | 0 | 0 | 0 | 0 | 0 | 0 | 0 | 0 | 0 | 0 | 0 | 0  | 0 | 0  | 0 | 4  | 0  | 0  | 2  |   |   |   |
| 226 | 1<br>0 | 0 | 0 | 0      | 0 | 0 | 0      | 0 | 0 | 0 | 0 | 0 | 0 | 0      | 0 | 0 | 0      | 0 | 0 | 0      | 0 | 0 | 0 | 0 | 0 | 0 | 0 | 0 | 0 | 0 | 0 | 0 | 0 | 0 | 0 | 0 | 0  | 0 | 0  | 0 | 0  | 15 | 0  | 0  | 3 |   |   |
| 227 | 6      | 0 | 0 | 0      | 0 | 0 | 0      | 0 | 0 | 0 | 0 | 0 | 0 | 0      | 0 | 0 | 0      | 0 | 0 | 0      | 0 | 0 | 0 | 0 | 0 | 0 | 0 | 0 | 0 | 0 | 0 | 0 | 0 | 0 | 0 | 0 | 0  | 0 | 0  | 0 | 0  | 15 | 0  | 0  | 3 |   |   |
| 228 | 0      | 0 | 0 | 0      | 0 | 0 | 0      | 0 | 0 | 0 | 0 | 0 | 0 | 0      | 0 | 0 | 0      | 0 | 0 | 0      | 0 | 0 | 0 | 0 | 0 | 0 | 0 | 0 | 0 | 0 | 0 | 0 | 0 | 0 | 0 | 0 | 0  | 0 | 0  | 0 | 0  | 0  | 0  | 1  |   |   |   |
| 229 | 0      | 0 | 0 | 0      | 0 | 0 | 0      | 0 | 0 | 0 | 0 | 0 | 0 | 0      | 0 | 0 | 0      | 0 | 0 | 0      | 0 | 0 | 0 | 0 | 0 | 0 | 0 | 0 | 0 | 0 | 0 | 0 | 0 | 0 | 0 | 0 | 0  | 0 | 0  | 0 | 0  | 0  | 0  | 1  |   |   |   |
| 230 | 1      | 0 | 0 | 0      | 0 | 0 | 0      | 0 | 0 | 0 | 0 | 0 | 0 | 0      | 0 | 0 | 0      | 0 | 0 | 0      | 0 | 0 | 0 | 0 | 0 | 0 | 0 | 0 | 0 | 0 | 0 | 0 | 0 | 0 | 0 | 0 | 0  | 0 | 0  | 0 | 0  | 0  | 1  | 0  | 0 | 1 |   |
| 231 | 0      | 0 | 0 | 0      | 0 | 0 | 0      | 0 | 0 | 0 | 0 | 0 | 0 | 3      | 0 | 0 | 0      | 0 | 0 | 0      | 0 | 0 | 0 | 0 | 0 | 0 | 0 | 0 | 0 | 0 | 0 | 0 | 0 | 0 | 0 | 0 | 0  | 0 | 0  | 0 | 0  | 14 | 0  | 0  | 2 |   |   |
| 232 | 3      | 0 | 0 | 0      | 0 | 0 | 0      | 0 | 0 | 0 | 0 | 1 | 0 | 0      | 0 | 0 | 6      | 0 | 0 | 3      | 0 | 0 | 0 | 0 | 0 | 0 | 0 | 0 | 0 | 0 | 0 | 0 | 0 | 0 | 0 | 0 | 0  | 0 | 0  | 0 | 0  | 8  | 0  | 0  | 1 |   |   |
| 233 | 1      | 0 | 0 | 1      | 0 | 0 | 0      | 0 | 0 | 0 | 0 | 0 | 0 | 0      | 0 | 0 | 0      | 0 | 0 | 1      | 0 | 0 | 0 | 0 | 0 | 0 | 0 | 0 | 0 | 0 | 0 | 0 | 0 | 0 | 0 | 0 | 0  | 0 | 0  | 0 | 13 | 0  | 0  | 1  |   |   |   |
| 234 | 1      | 0 | 0 | 1      | 0 | 0 | 0      | 0 | 0 | 0 | 0 | 0 | 0 | 0      | 0 | 0 | 0      | 0 | 0 | 1      | 0 | 0 | 0 | 0 | 0 | 0 | 0 | 0 | 0 | 0 | 0 | 0 | 0 | 0 | 0 | 0 | 0  | 0 | 0  | 0 | 30 | 0  | 0  | 1  |   |   |   |
| 235 | 4      | 0 | 0 | 4      | 0 | 0 | 0      | 0 | 0 | 0 | 0 | 0 | 0 | 0      | 0 | 0 | 0      | 0 | 0 | 1<br>4 | 0 | 0 | 2 | 0 | 0 | 0 | 0 | 0 | 0 | 0 | 0 | 0 | 0 | 0 | 0 | 0 | 0  | 0 | 0  | 0 | 0  | 35 | 0  | 0  | 1 |   |   |
| 236 | 1<br>5 | 0 | 0 | 1<br>5 | 0 | 0 | 4      | 0 | 0 | 4 | 0 | 0 | 0 | 0      | 0 | 0 | 0      | 0 | 0 | 0      | 0 | 2 | 0 | 0 | 0 | 0 | 0 | 0 | 0 | 0 | 0 | 0 | 0 | 0 | 0 | 0 | 0  | 0 | 0  | 0 | 0  | 30 | 0  | 8  | 1 |   |   |
| 237 | 2      | 0 | 0 | 0      | 0 | 0 | 0      | 0 | 0 | 0 | 1 | 0 | 0 | 0      | 0 | 0 | 0      | 0 | 4 | 0      | 0 | 0 | 2 | 0 | 0 | 0 | 0 | 0 | 0 | 0 | 0 | 0 | 0 | 0 | 0 | 0 | 0  | 0 | 0  | 0 | 5  | 0  | 0  | 1  |   |   |   |
| 238 | 0      | 0 | 0 | 0      | 0 | 0 | 0      | 0 | 0 | 0 | 1 | 0 | 0 | 0      | 0 | 0 | 0      | 0 | 1 | 0      | 0 | 0 | 1 | 0 | 0 | 0 | 0 | 0 | 0 | 0 | 0 | 0 | 0 | 0 | 0 | 0 | 0  | 0 | 0  | 0 | 10 | 4  | 0  | 1  |   |   |   |
| 239 | 0      | 0 | 0 | 0      | 0 | 0 | 0      | 0 | 0 | 0 | 0 | 0 | 0 | 0      | 0 | 0 | 0      | 0 | 0 | 0      | 0 | 0 | 0 | 0 | 0 | 0 | 0 | 0 | 0 | 0 | 0 | 0 | 0 | 0 | 0 | 0 | 0  | 0 | 0  | 0 | 0  | 0  | 0  | 1  |   |   |   |
| 240 | 2      | 0 | 0 | 2      | 0 | 0 | 0      | 0 | 0 | 1 | 0 | 0 | 0 | 0      | 0 | 0 | 0      | 0 | 0 | 0      | 0 | 0 | 0 | 0 | 0 | 0 | 0 | 0 | 0 | 0 | 0 | 0 | 0 | 0 | 0 | 0 | 0  | 0 | 0  | 0 | 0  | 3  | 0  | 0  | 2 |   |   |
| 241 | 0      | 1 | 0 | 0      | 0 | 0 | 0      | 1 | 0 | 0 | 0 | 0 | 0 | 1      | 0 | 0 | 0      | 0 | 3 | 0      | 0 | 0 | 0 | 0 | 0 | 0 | 0 | 0 | 0 | 0 | 0 | 0 | 0 | 0 | 0 | 0 | 0  | 0 | 0  | 0 | 0  | 8  | 0  | 0  | 1 |   |   |
| 242 | 2      | 0 | 0 | 0      | 0 | 0 | 0      | 0 | 0 | 0 | 0 | 0 | 0 | 2<br>1 | 0 | 0 | 2<br>1 | 0 | 3 | 0      | 0 | 0 | 7 | 0 | 0 | 0 |   |   |   |   |   |   |   |   |   |   |    |   |    |   |    |    |    | 25 | 1 | 0 | 2 |
| 243 | 3      | 0 | 0 | 0      | 0 | 0 | 1      | 0 | 0 | 1 | 0 | 0 | 1 | 0      | 0 | 0 | 0      | 0 | 0 | 0      | 0 | 0 | 0 | 0 | 0 | 0 | 0 | 0 | 0 | 0 | 0 | 0 | 0 | 0 | 0 | 0 | 0  | 0 | 0  | 0 | 0  | 0  | 10 | 0  | 0 | 1 |   |

|     |   |   |   |   |   |   |   |   |   |   |   |   |   |   |   |   |   |   |   |   |   |   |   |   |   |    |    |   |   |   |
|-----|---|---|---|---|---|---|---|---|---|---|---|---|---|---|---|---|---|---|---|---|---|---|---|---|---|----|----|---|---|---|
| 244 | 0 | 2 | 0 | 0 | 0 | 0 | 0 | 0 | 0 | 0 | 0 | 0 | 1 | 1 | 0 | 0 | 1 | 0 | 0 | 0 | 0 | 0 | 0 | 0 | 0 | 0  | 10 | 0 | 2 | 1 |
| 245 | 1 | 0 | 0 | 0 | 0 | 0 | 0 | 0 | 0 | 1 | 0 | 0 | 1 | 9 | 0 | 0 | 0 | 0 | 5 | 0 | 0 | 0 | 0 | 0 | 0 | 0  | 6  | 0 | 0 | 1 |
| 246 | 9 | 0 | 0 | 0 | 0 | 0 | 0 | 0 | 0 | 2 | 0 | 0 | 0 | 4 | 0 | 0 | 0 | 0 | 0 | 1 | 0 | 0 | 0 | 0 | 0 | 0  | 4  | 0 | 0 | 2 |
| 247 | 2 | 0 | 0 | 0 | 0 | 0 | 0 | 1 | 0 | 0 | 1 | 0 | 3 | 0 | 0 | 5 | 0 | 0 | 1 | 0 | 0 | 0 | 0 | 0 | 0 | 0  | 10 | 0 | 0 | 1 |
| 248 | 0 | 0 | 0 | 0 | 0 | 0 | 0 | 2 | 0 | 0 | 2 | 0 | 0 | 0 | 0 | 0 | 0 | 0 | 0 | 0 | 0 | 0 | 0 | 0 | 0 | 0  | 4  | 0 | 0 | 1 |
| 249 | 1 | 0 | 0 | 0 | 0 | 0 | 0 | 0 | 0 | 0 | 0 | 0 | 3 | 0 | 0 | 3 | 0 | 0 | 0 | 0 | 0 | 0 | 0 | 0 | 0 | 0  | 12 | 0 | 3 | 2 |
| 250 | 4 | 0 | 0 | 0 | 0 | 0 | 2 | 0 | 0 | 0 | 0 | 0 | 0 | 0 | 0 | 0 | 0 | 9 | 0 | 0 | 0 | 0 | 0 | 0 | 0 | 6  | 0  | 0 | 2 |   |
| 251 | 0 | 0 | 0 | 0 | 0 | 0 | 4 | 0 | 0 | 0 | 0 | 0 | 2 | 0 | 0 | 0 | 0 | 0 | 0 | 0 | 0 | 0 | 0 | 0 | 0 | 4  | 0  | 0 | 1 |   |
| 252 | 1 | 0 | 0 | 0 | 0 | 0 | 0 | 0 | 0 | 0 | 0 | 0 | 0 | 0 | 0 | 0 | 0 | 0 | 0 | 0 | 0 | 0 | 0 | 0 | 0 | 20 | 0  | 0 | 2 |   |
| 253 | 1 | 0 | 0 | 0 | 0 | 0 | 0 | 0 | 0 | 1 | 0 | 0 | 2 | 0 | 0 | 0 | 0 | 0 | 0 | 0 | 0 | 0 | 0 | 0 | 0 | 16 | 0  | 0 | 2 |   |
| 254 | 0 | 5 | 0 | 0 | 0 | 0 | 0 | 0 | 0 | 0 | 0 | 1 | 0 | 0 | 0 | 0 | 0 | 0 | 0 | 0 | 0 | 0 | 0 | 0 | 0 | 7  | 0  | 0 | 1 |   |
| 255 | 3 | 0 | 0 | 0 | 0 | 0 | 0 | 0 | 0 | 0 | 0 | 0 | 0 | 0 | 0 | 0 | 0 | 2 | 0 | 0 | 0 | 0 | 0 | 0 | 0 | 35 | 0  | 0 | 1 |   |
| 256 | 0 | 0 | 0 | 0 | 0 | 0 | 0 | 0 | 0 | 0 | 0 | 0 | 0 | 1 | 0 | 0 | 1 | 0 | 0 | 0 | 0 | 0 | 0 | 0 | 0 | 10 | 0  | 0 | 1 |   |
| 257 | 5 | 0 | 0 | 0 | 0 | 0 | 0 | 0 | 0 | 0 | 0 | 0 | 0 | 0 | 0 | 0 | 0 | 0 | 0 | 0 | 0 | 0 | 0 | 0 | 0 | 35 | 0  | 0 | 2 |   |
| 258 | 5 | 0 | 0 | 0 | 0 | 0 | 2 | 0 | 0 | 0 | 0 | 0 | 2 | 0 | 0 | 0 | 0 | 0 | 0 | 0 | 0 | 0 | 0 | 0 | 0 | 20 | 0  | 3 | 2 |   |
| 259 | 2 | 0 | 0 | 0 | 0 | 0 | 0 | 0 | 0 | 0 | 0 | 1 | 0 | 0 | 0 | 0 | 0 | 0 | 0 | 0 | 0 | 0 | 0 | 0 | 0 | 10 | 0  | 0 | 1 |   |
| 260 | 0 | 0 | 0 | 0 | 0 | 0 | 0 | 0 | 0 | 0 | 0 | 0 | 0 | 0 | 0 | 0 | 0 | 0 | 0 | 0 | 0 | 0 | 0 | 0 | 0 | 0  | 0  | 0 | 1 |   |
| 261 | 0 | 5 | 0 | 0 | 0 | 0 | 0 | 0 | 0 | 0 | 0 | 0 | 0 | 0 | 0 | 0 | 0 | 0 | 0 | 0 | 0 | 0 | 0 | 0 | 0 | 35 | 0  | 0 | 1 |   |
| 262 | 2 | 0 | 0 | 0 | 0 | 0 | 0 | 0 | 0 | 0 | 0 | 0 | 0 | 0 | 0 | 0 | 0 | 0 | 0 | 0 | 0 | 0 | 0 | 0 | 0 | 16 | 0  | 0 | 1 |   |
| 263 | 1 | 0 | 0 | 0 | 0 | 0 | 3 | 0 | 0 | 0 | 0 | 0 | 0 | 0 | 0 | 0 | 0 | 0 | 0 | 0 | 0 | 0 | 0 | 0 | 0 | 10 | 0  | 1 | 2 |   |
| 264 | 0 | 0 | 0 | 0 | 0 | 0 | 1 | 0 | 0 | 0 | 0 | 0 | 8 | 0 | 0 | 4 | 0 | 0 | 0 | 0 | 0 | 0 | 0 | 0 | 0 | 15 | 0  | 0 | 1 |   |
| 265 | 0 | 0 | 0 | 0 | 0 | 0 | 0 | 0 | 0 | 0 | 0 | 0 | 0 | 0 | 0 | 6 | 0 | 0 | 0 | 0 | 0 | 0 | 0 | 0 | 0 | 4  | 0  | 0 | 1 |   |
| 266 | 0 | 0 | 0 | 0 | 0 | 0 | 3 | 0 | 0 | 0 | 0 | 0 | 3 | 0 | 0 | 3 | 0 | 0 | 0 | 0 | 0 | 0 | 0 | 0 | 0 | 5  | 0  | 0 | 2 |   |
| 267 | 0 | 0 | 0 | 0 | 0 | 0 | 0 | 0 | 0 | 0 | 0 | 0 | 0 | 0 | 0 | 2 | 0 | 0 | 0 | 0 | 0 | 0 | 0 | 0 | 0 | 8  | 0  | 1 | 0 |   |
| 268 | 0 | 0 | 0 | 0 | 0 | 0 | 0 | 0 | 0 | 0 | 0 | 0 | 0 | 0 | 0 | 0 | 0 | 0 | 0 | 0 | 0 | 0 | 0 | 0 | 0 | 0  | 0  | 0 | 2 |   |
| 269 | 2 | 0 | 0 | 0 | 0 | 0 | 0 | 0 | 0 | 0 | 0 | 0 | 4 | 0 | 0 | 0 | 0 | 0 | 0 | 0 | 0 | 0 | 0 | 0 | 0 | 3  | 0  | 2 | 1 |   |
| 270 | 3 | 0 | 0 | 0 | 0 | 0 | 0 | 2 | 0 | 0 | 0 | 0 | 0 | 2 | 0 | 0 | 0 | 0 | 0 | 0 | 0 | 0 | 0 | 0 | 0 | 15 | 0  | 0 | 1 |   |
| 271 | 0 | 0 | 0 | 0 | 0 | 0 | 0 | 0 | 0 | 0 | 0 | 1 | 6 | 0 | 0 | 0 | 0 | 0 | 0 | 0 | 0 | 0 | 0 | 0 | 0 | 7  | 0  | 0 | 1 |   |









|     |   |   |   |   |   |   |   |   |   |   |   |   |   |   |   |   |   |   |   |   |   |   |   |   |   |    |    |    |    |   |   |   |   |
|-----|---|---|---|---|---|---|---|---|---|---|---|---|---|---|---|---|---|---|---|---|---|---|---|---|---|----|----|----|----|---|---|---|---|
| 368 | 0 | 2 | 0 | 0 | 0 | 0 | 4 | 0 | 0 | 0 | 0 | 0 | 0 | 0 | 0 | 0 | 0 | 0 | 0 | 0 | 0 | 0 | 0 | 0 | 0 | 5  | 0  | 0  | 40 | 0 | 0 | 1 |   |
| 369 | 0 | 0 | 0 | 0 | 0 | 0 | 0 | 0 | 0 | 0 | 0 | 0 | 0 | 0 | 0 | 0 | 0 | 0 | 0 | 0 | 0 | 0 | 0 | 0 | 0 | 0  | 0  | 0  | 0  | 0 | 0 | 2 |   |
| 370 | 0 | 0 | 0 | 0 | 0 | 0 | 0 | 0 | 0 | 0 | 0 | 0 | 0 | 0 | 0 | 0 | 0 | 0 | 0 | 0 | 0 | 0 | 0 | 0 | 0 | 0  | 0  | 0  | 0  | 0 | 0 | 2 |   |
| 371 | 0 | 0 | 0 | 0 | 0 | 0 | 0 | 0 | 0 | 0 | 0 | 0 | 0 | 0 | 0 | 0 | 0 | 0 | 0 | 0 | 0 | 0 | 0 | 0 | 0 | 0  | 0  | 0  | 0  | 0 | 0 | 1 |   |
| 372 | 0 | 0 | 0 | 0 | 0 | 0 | 0 | 0 | 0 | 0 | 0 | 0 | 0 | 0 | 0 | 0 | 0 | 0 | 0 | 0 | 0 | 0 | 0 | 0 | 0 | 0  | 0  | 0  | 0  | 0 | 0 | 1 |   |
| 373 | 2 | 0 | 0 | 0 | 0 | 0 | 0 | 0 | 0 | 0 | 0 | 0 | 0 | 0 | 0 | 0 | 0 | 0 | 0 | 0 | 0 | 0 | 0 | 0 | 0 | 0  | 0  | 0  | 1  | 0 | 0 | 2 |   |
| 374 | 0 | 0 | 0 | 0 | 0 | 0 | 0 | 0 | 0 | 0 | 0 | 0 | 0 | 0 | 0 | 0 | 0 | 0 | 0 | 0 | 0 | 0 | 0 | 0 | 0 | 0  | 0  | 0  | 0  | 0 | 0 | 1 |   |
| 375 | 0 | 0 | 0 | 0 | 0 | 0 | 0 | 0 | 0 | 0 | 0 | 0 | 0 | 0 | 0 | 0 | 0 | 0 | 0 | 0 | 0 | 0 | 0 | 0 | 0 | 0  | 0  | 0  | 0  | 0 | 0 | 1 |   |
| 376 | 0 | 0 | 0 | 0 | 0 | 0 | 0 | 0 | 0 | 0 | 0 | 0 | 0 | 0 | 0 | 0 | 0 | 0 | 0 | 0 | 0 | 0 | 0 | 0 | 0 | 0  | 0  | 0  | 0  | 0 | 0 | 1 |   |
| 377 | 0 | 0 | 0 | 0 | 0 | 0 | 0 | 0 | 0 | 0 | 0 | 0 | 0 | 0 | 0 | 0 | 0 | 0 | 0 | 0 | 0 | 0 | 0 | 0 | 0 | 0  | 0  | 0  | 0  | 0 | 0 | 1 |   |
| 378 | 0 | 0 | 0 | 0 | 0 | 0 | 0 | 0 | 0 | 0 | 0 | 0 | 0 | 0 | 0 | 0 | 0 | 0 | 0 | 0 | 0 | 0 | 0 | 0 | 0 | 0  | 0  | 0  | 0  | 0 | 0 | 1 |   |
| 379 | 0 | 0 | 0 | 0 | 0 | 0 | 0 | 0 | 0 | 0 | 0 | 0 | 0 | 0 | 0 | 0 | 0 | 0 | 0 | 0 | 0 | 0 | 0 | 0 | 0 | 0  | 0  | 0  | 0  | 0 | 0 | 2 |   |
| 380 | 1 | 0 | 0 | 2 | 0 | 0 | 0 | 0 | 0 | 0 | 0 | 0 | 0 | 0 | 0 | 0 | 0 | 0 | 0 | 0 | 0 | 0 | 0 | 0 | 0 | 0  | 0  | 0  | 0  | 8 | 0 | 1 | 2 |
| 381 | 0 | 0 | 0 | 0 | 0 | 0 | 0 | 0 | 0 | 0 | 0 | 0 | 0 | 0 | 0 | 0 | 0 | 0 | 0 | 0 | 0 | 0 | 0 | 0 | 0 | 0  | 0  | 0  | 0  | 0 | 0 | 2 |   |
| 382 | 0 | 0 | 0 | 0 | 0 | 0 | 0 | 0 | 1 | 0 | 0 | 0 | 0 | 0 | 4 | 0 | 0 | 0 | 0 | 0 | 0 | 0 | 0 | 0 | 0 | 3  | 0  | 0  | 6  | 0 | 0 | 1 |   |
| 383 | 4 | 0 | 0 | 0 | 0 | 0 | 0 | 0 | 0 | 0 | 0 | 0 | 0 | 0 | 0 | 0 | 0 | 0 | 0 | 0 | 0 | 0 | 0 | 0 | 0 | 0  | 0  | 10 | 0  | 0 | 3 |   |   |
| 384 | 0 | 0 | 0 | 0 | 0 | 0 | 0 | 0 | 0 | 0 | 0 | 0 | 0 | 0 | 0 | 0 | 0 | 0 | 0 | 0 | 0 | 0 | 0 | 0 | 0 | 0  | 0  | 0  | 0  | 0 | 0 | 2 |   |
| 385 | 3 | 0 | 0 | 0 | 0 | 0 | 0 | 0 | 0 | 0 | 0 | 0 | 0 | 0 | 0 | 0 | 0 | 0 | 0 | 0 | 0 | 0 | 0 | 0 | 0 | 0  | 0  | 1  | 0  | 0 | 2 |   |   |
| 386 | 3 | 0 | 0 | 0 | 0 | 0 | 0 | 0 | 0 | 0 | 0 | 0 | 0 | 0 | 0 | 0 | 2 | 0 | 0 | 0 | 2 | 0 | 2 | 0 | 0 | 0  | 40 | 1  | 0  | 1 |   |   |   |
| 387 | 4 | 0 | 0 | 0 | 0 | 0 | 0 | 0 | 0 | 0 | 0 | 0 | 1 | 0 | 0 | 0 | 0 | 0 | 0 | 0 | 0 | 0 | 0 | 0 | 0 | 0  | 0  | 20 | 0  | 0 | 1 |   |   |
| 388 | 3 | 0 | 0 | 0 | 0 | 0 | 0 | 0 | 0 | 0 | 0 | 0 | 0 | 0 | 0 | 0 | 1 | 5 | 0 | 0 | 0 | 0 | 0 | 0 | 0 | 0  | 38 | 0  | 1  | 1 |   |   |   |
| 389 | 4 | 0 | 0 | 0 | 0 | 0 | 2 | 0 | 0 | 0 | 3 | 0 | 1 | 0 | 0 | 1 | 0 | 0 | 0 | 0 | 0 | 0 | 0 | 0 | 0 | 0  | 10 | 0  | 0  | 1 |   |   |   |
| 390 | 1 | 2 | 0 | 0 | 0 | 0 | 0 | 0 | 0 | 0 | 0 | 0 | 0 | 0 | 0 | 0 | 0 | 0 | 0 | 0 | 0 | 0 | 0 | 0 | 0 | 0  | 30 | 0  | 0  | 2 |   |   |   |
| 391 | 1 | 5 | 0 | 0 | 0 | 0 | 0 | 0 | 0 | 0 | 0 | 1 | 0 | 0 | 0 | 0 | 0 | 3 | 0 | 0 | 0 | 0 | 0 | 5 | 0 | 0  | 18 | 0  | 0  | 2 |   |   |   |
| 392 | 3 | 0 | 0 | 0 | 0 | 0 | 0 | 0 | 2 | 0 | 0 | 1 | 0 | 0 | 0 | 0 | 6 | 0 | 0 | 0 | 0 | 0 | 4 | 0 | 0 | 25 | 0  | 0  | 2  |   |   |   |   |
| 393 | 2 | 0 | 0 | 0 | 0 | 0 | 0 | 1 | 0 | 0 | 0 | 0 | 0 | 0 | 0 | 0 | 0 | 0 | 0 | 0 | 0 | 0 | 2 | 6 | 0 | 0  | 24 | 3  | 0  | 1 |   |   |   |
| 394 | 4 | 0 | 0 | 0 | 0 | 0 | 0 | 0 | 0 | 0 | 0 | 0 | 0 | 0 | 0 | 0 | 0 | 0 | 0 | 0 | 0 | 1 | 0 | 2 | 5 | 0  | 0  | 27 | 0  | 0 | 1 |   |   |
| 395 | 3 | 0 | 0 | 0 | 0 | 0 | 0 | 0 | 0 | 0 | 0 | 0 | 0 | 0 | 0 | 0 | 0 | 0 | 0 | 0 | 0 | 0 | 0 | 0 | 0 | 0  | 25 | 5  | 0  | 2 |   |   |   |
| 396 | 4 | 0 | 0 | 3 | 0 | 0 | 0 | 1 | 0 | 0 | 1 | 0 | 0 | 3 | 0 | 0 | 1 | 2 | 0 | 0 | 1 | 0 | 0 | 1 | 0 | 0  | 23 | 6  | 6  | 1 |   |   |   |

|     |               |   |   |   |   |   |   |   |   |   |   |   |   |   |   |               |   |   |   |   |   |   |   |   |   |               |   |    |    |   |   |   |
|-----|---------------|---|---|---|---|---|---|---|---|---|---|---|---|---|---|---------------|---|---|---|---|---|---|---|---|---|---------------|---|----|----|---|---|---|
| 397 | 5             | 0 | 0 | 2 | 0 | 0 | 0 | 0 | 0 | 0 | 0 | 0 | 0 | 0 | 0 | 0             | 0 | 0 | 0 | 0 | 0 | 0 | 2 | 0 | 0 | 2             | 0 | 20 | 0  | 0 | 1 |   |
| 398 | 5             | 0 | 0 | 0 | 0 | 0 | 0 | 0 | 0 | 0 | 0 | 0 | 0 | 0 | 0 | 0             | 0 | 0 | 0 | 0 | 0 | 0 | 1 | 0 | 0 | $\frac{1}{2}$ | 0 | 0  | 25 | 0 | 0 | 1 |
| 399 | 0             | 0 | 0 | 0 | 0 | 0 | 0 | 0 | 0 | 0 | 0 | 0 | 0 | 0 | 0 | $\frac{1}{5}$ | 0 | 0 | 0 | 0 | 0 | 0 | 0 | 0 | 0 | $\frac{1}{5}$ | 0 | 0  | 12 | 0 | 0 | 2 |
| 400 | $\frac{1}{0}$ | 0 | 0 | 0 | 0 | 0 | 0 | 0 | 0 | 0 | 0 | 0 | 0 | 0 | 0 | 0             | 0 | 8 | 0 | 0 | 0 | 0 | 0 | 0 | 0 | 5             | 0 | 0  | 40 | 0 | 0 | 1 |
