# Supplementary material for: Bacteria in the oral cavity of individuals consuming intoxicating substances
Source: PubMed Central journal article supplement (PMC10218728; doi:10.1371/journal.pone.0285753), 2023-05-26
Supplement: pone.0285753.s005.pdf [file pone.0285753.s005.pdf]

**S5-Table: Record on microbes isolated from swab.**

| <b>PARTICIPANT<br/>ID</b> | <b>MICROBES ISOLATED (1 = YES, 0 = NO)</b> |                          |                          |                             |                             |                               |                              |                         |                            |
|---------------------------|--------------------------------------------|--------------------------|--------------------------|-----------------------------|-----------------------------|-------------------------------|------------------------------|-------------------------|----------------------------|
|                           | <b>Staphylococcus<br/>(B1)</b>             | <b>Bacillus<br/>(B2)</b> | <b>Serratia<br/>(B3)</b> | <b>Rhodococcus<br/>(B4)</b> | <b>Pseudomonus<br/>(B5)</b> | <b>Acinetobacter<br/>(B6)</b> | <b>Enterobacter<br/>(B7)</b> | <b>Candida<br/>(F1)</b> | <b>Klebsiella<br/>(B8)</b> |
| 101                       | 1                                          | 1                        | 0                        | 0                           | 0                           | 0                             | 0                            | 0                       | 0                          |
| 102                       | 1                                          | 0                        | 0                        | 0                           | 0                           | 0                             | 0                            | 1                       | 0                          |
| 103                       | 1                                          | 0                        | 0                        | 0                           | 0                           | 0                             | 0                            | 0                       | 0                          |
| 104                       | 0                                          | 0                        | 0                        | 0                           | 1                           | 0                             | 0                            | 0                       | 0                          |
| 105                       | 0                                          | 0                        | 0                        | 0                           | 1                           | 0                             | 0                            | 0                       | 0                          |
| 106                       | 1                                          | 1                        | 0                        | 0                           | 0                           | 0                             | 0                            | 0                       | 0                          |
| 107                       | 1                                          | 1                        | 0                        | 0                           | 0                           | 0                             | 0                            | 0                       | 0                          |
| 108                       | 1                                          | 0                        | 0                        | 0                           | 0                           | 0                             | 0                            | 0                       | 0                          |
| 109                       | 1                                          | 0                        | 0                        | 0                           | 0                           | 0                             | 0                            | 0                       | 0                          |
| 110                       | 1                                          | 0                        | 0                        | 0                           | 0                           | 0                             | 0                            | 0                       | 0                          |
| 111                       | 0                                          | 1                        | 0                        | 0                           | 0                           | 0                             | 0                            | 0                       | 0                          |
| 112                       | 1                                          | 0                        | 0                        | 0                           | 0                           | 0                             | 0                            | 0                       | 0                          |
| 113                       | 0                                          | 1                        | 0                        | 0                           | 0                           | 0                             | 0                            | 0                       | 0                          |
| 114                       | 1                                          | 1                        | 0                        | 0                           | 0                           | 0                             | 0                            | 0                       | 0                          |
| 115                       | 0                                          | 1                        | 0                        | 0                           | 0                           | 0                             | 0                            | 0                       | 0                          |
| 116                       | 0                                          | 1                        | 0                        | 0                           | 0                           | 0                             | 0                            | 0                       | 0                          |
| 117                       | 1                                          | 0                        | 0                        | 0                           | 0                           | 0                             | 0                            | 0                       | 0                          |
| 118                       | 1                                          | 1                        | 0                        | 0                           | 0                           | 0                             | 0                            | 0                       | 0                          |
| 119                       | 1                                          | 0                        | 0                        | 0                           | 0                           | 0                             | 0                            | 0                       | 0                          |
| 120                       | 0                                          | 1                        | 0                        | 0                           | 0                           | 0                             | 0                            | 0                       | 0                          |
| 121                       | 0                                          | 1                        | 0                        | 0                           | 1                           | 0                             | 0                            | 0                       | 0                          |
| 122                       | 0                                          | 1                        | 0                        | 0                           | 0                           | 0                             | 0                            | 0                       | 0                          |
| 123                       | 0                                          | 1                        | 0                        | 0                           | 1                           | 0                             | 0                            | 0                       | 0                          |
| 124                       | 1                                          | 1                        | 0                        | 0                           | 0                           | 0                             | 0                            | 0                       | 0                          |
| 125                       | 1                                          | 1                        | 0                        | 0                           | 0                           | 0                             | 0                            | 0                       | 0                          |
| 126                       | 0                                          | 1                        | 0                        | 0                           | 0                           | 0                             | 0                            | 0                       | 0                          |
| 127                       | 1                                          | 1                        | 0                        | 0                           | 0                           | 0                             | 0                            | 0                       | 0                          |
| 128                       | 1                                          | 1                        | 0                        | 0                           | 0                           | 0                             | 0                            | 0                       | 0                          |

|     |   |   |   |   |   |   |   |   |   |
|-----|---|---|---|---|---|---|---|---|---|
| 129 | 1 | 0 | 0 | 0 | 0 | 0 | 0 | 0 | 0 |
| 130 | 1 | 1 | 0 | 0 | 0 | 0 | 0 | 0 | 0 |
| 131 | 0 | 1 | 0 | 0 | 0 | 0 | 0 | 0 | 0 |
| 132 | 1 | 0 | 0 | 0 | 0 | 0 | 0 | 0 | 0 |
| 133 | 1 | 1 | 1 | 0 | 1 | 0 | 0 | 0 | 0 |
| 134 | 1 | 0 | 0 | 0 | 0 | 0 | 0 | 0 | 0 |
| 135 | 0 | 1 | 0 | 0 | 0 | 0 | 0 | 0 | 0 |
| 136 | 1 | 0 | 0 | 0 | 0 | 0 | 0 | 0 | 0 |
| 137 | 1 | 0 | 0 | 0 | 0 | 0 | 0 | 0 | 0 |
| 138 | 0 | 0 | 0 | 0 | 1 | 0 | 0 | 0 | 0 |
| 139 | 1 | 0 | 0 | 0 | 0 | 0 | 0 | 0 | 0 |
| 140 | 0 | 1 | 0 | 0 | 0 | 0 | 0 | 0 | 0 |
| 141 | 0 | 1 | 0 | 0 | 1 | 0 | 0 | 0 | 0 |
| 142 | 1 | 1 | 0 | 0 | 0 | 0 | 0 | 0 | 0 |
| 143 | 0 | 1 | 0 | 0 | 0 | 0 | 0 | 0 | 0 |
| 144 | 0 | 1 | 0 | 0 | 1 | 0 | 0 | 0 | 0 |
| 145 | 0 | 1 | 0 | 0 | 0 | 0 | 0 | 0 | 0 |
| 146 | 0 | 1 | 0 | 0 | 0 | 0 | 0 | 0 | 0 |
| 147 | 1 | 1 | 0 | 0 | 1 | 0 | 0 | 0 | 0 |
| 148 | 1 | 0 | 1 | 0 | 0 | 0 | 1 | 0 | 0 |
| 149 | 1 | 1 | 0 | 0 | 0 | 0 | 0 | 0 | 0 |
| 150 | 1 | 1 | 0 | 0 | 0 | 0 | 0 | 0 | 0 |
| 151 | 0 | 0 | 0 | 0 | 1 | 0 | 0 | 0 | 0 |
| 152 | 1 | 1 | 0 | 0 | 0 | 0 | 0 | 0 | 0 |
| 153 | 1 | 1 | 0 | 0 | 0 | 0 | 0 | 0 | 0 |
| 154 | 0 | 0 | 1 | 0 | 0 | 0 | 0 | 0 | 0 |
| 155 | 1 | 1 | 0 | 0 | 0 | 0 | 0 | 0 | 0 |
| 156 | 1 | 0 | 0 | 0 | 0 | 0 | 0 | 0 | 0 |
| 157 | 1 | 0 | 0 | 1 | 1 | 0 | 0 | 0 | 0 |
| 158 | 0 | 1 | 0 | 0 | 0 | 0 | 0 | 0 | 0 |
| 159 | 1 | 0 | 0 | 0 | 0 | 0 | 0 | 0 | 0 |
| 160 | 1 | 1 | 0 | 0 | 0 | 0 | 0 | 0 | 0 |

|     |   |   |   |   |   |   |   |   |   |
|-----|---|---|---|---|---|---|---|---|---|
| 161 | 0 | 0 | 0 | 0 | 0 | 0 | 0 | 0 | 1 |
| 162 | 1 | 0 | 0 | 0 | 0 | 0 | 0 | 0 | 1 |
| 163 | 0 | 1 | 0 | 0 | 0 | 0 | 0 | 0 | 0 |
| 164 | 0 | 0 | 0 | 0 | 1 | 0 | 0 | 0 | 0 |
| 165 | 0 | 1 | 0 | 0 | 0 | 0 | 0 | 0 | 0 |
| 166 | 1 | 0 | 1 | 0 | 0 | 0 | 0 | 0 | 0 |
| 167 | 1 | 0 | 0 | 0 | 1 | 0 | 0 | 0 | 0 |
| 168 | 0 | 1 | 1 | 0 | 0 | 0 | 0 | 0 | 0 |
| 169 | 0 | 0 | 1 | 0 | 0 | 0 | 0 | 0 | 0 |
| 170 | 1 | 1 | 0 | 0 | 0 | 0 | 0 | 0 | 0 |
| 171 | 0 | 1 | 0 | 0 | 0 | 0 | 0 | 0 | 0 |
| 172 | 1 | 1 | 0 | 0 | 0 | 0 | 0 | 0 | 0 |
| 173 | 0 | 1 | 0 | 0 | 0 | 0 | 0 | 0 | 0 |
| 174 | 1 | 0 | 0 | 0 | 0 | 0 | 0 | 0 | 0 |
| 175 | 1 | 0 | 0 | 0 | 0 | 0 | 0 | 0 | 0 |
| 176 | 1 | 1 | 0 | 0 | 0 | 0 | 0 | 0 | 0 |
| 177 | 1 | 1 | 0 | 0 | 0 | 0 | 0 | 0 | 0 |
| 178 | 1 | 1 | 0 | 0 | 0 | 0 | 0 | 0 | 0 |
| 179 | 1 | 0 | 0 | 0 | 0 | 0 | 0 | 0 | 0 |
| 180 | 0 | 1 | 0 | 0 | 0 | 0 | 0 | 0 | 0 |
| 181 | 1 | 1 | 0 | 0 | 1 | 0 | 0 | 0 | 0 |
| 182 | 1 | 0 | 0 | 0 | 0 | 0 | 0 | 0 | 0 |
| 183 | 1 | 1 | 0 | 0 | 0 | 0 | 0 | 0 | 0 |
| 184 | 1 | 0 | 0 | 0 | 0 | 0 | 0 | 0 | 0 |
| 185 | 0 | 1 | 0 | 0 | 0 | 0 | 0 | 0 | 0 |
| 186 | 0 | 1 | 0 | 0 | 0 | 1 | 0 | 0 | 0 |
| 187 | 1 | 0 | 0 | 0 | 0 | 0 | 0 | 0 | 0 |
| 188 | 1 | 0 | 0 | 0 | 0 | 0 | 0 | 0 | 0 |
| 189 | 0 | 0 | 0 | 0 | 1 | 0 | 0 | 0 | 0 |
| 190 | 0 | 1 | 0 | 0 | 1 | 0 | 0 | 0 | 0 |
| 191 | 1 | 1 | 0 | 0 | 0 | 0 | 0 | 0 | 0 |
| 192 | 0 | 1 | 0 | 0 | 0 | 0 | 0 | 0 | 0 |

|     |   |   |   |   |   |   |   |   |   |
|-----|---|---|---|---|---|---|---|---|---|
| 193 | 1 | 0 | 0 | 0 | 0 | 0 | 0 | 0 | 0 |
| 194 | 1 | 1 | 0 | 0 | 0 | 0 | 0 | 0 | 0 |
| 195 | 0 | 1 | 0 | 0 | 0 | 0 | 0 | 0 | 0 |
| 196 | 1 | 1 | 0 | 0 | 0 | 0 | 0 | 0 | 0 |
| 197 | 0 | 1 | 0 | 0 | 0 | 0 | 0 | 0 | 0 |
| 198 | 1 | 0 | 0 | 0 | 0 | 0 | 0 | 0 | 0 |
| 199 | 0 | 1 | 0 | 0 | 0 | 0 | 0 | 0 | 0 |
| 200 | 0 | 0 | 0 | 0 | 1 | 0 | 0 | 0 | 0 |
| 201 | 1 | 0 | 0 | 0 | 0 | 0 | 0 | 0 | 0 |
| 202 | 0 | 1 | 0 | 0 | 0 | 0 | 0 | 0 | 0 |
| 203 | 1 | 0 | 0 | 0 | 0 | 0 | 0 | 0 | 0 |
| 204 | 1 | 0 | 0 | 0 | 0 | 1 | 0 | 0 | 0 |
| 205 | 0 | 0 | 0 | 0 | 0 | 0 | 1 | 0 | 0 |
| 206 | 1 | 0 | 0 | 0 | 0 | 0 | 0 | 0 | 0 |
| 207 | 1 | 1 | 0 | 0 | 0 | 0 | 0 | 0 | 0 |
| 208 | 1 | 1 | 0 | 0 | 1 | 0 | 0 | 0 | 0 |
| 209 | 1 | 1 | 0 | 0 | 0 | 0 | 0 | 0 | 0 |
| 210 | 1 | 0 | 0 | 0 | 0 | 0 | 0 | 0 | 0 |
| 211 | 1 | 1 | 0 | 0 | 0 | 0 | 0 | 0 | 0 |
| 212 | 0 | 0 | 0 | 0 | 1 | 0 | 0 | 0 | 0 |
| 213 | 0 | 0 | 0 | 0 | 1 | 0 | 0 | 0 | 0 |
| 214 | 0 | 0 | 0 | 0 | 1 | 0 | 0 | 0 | 0 |
| 215 | 1 | 1 | 0 | 0 | 0 | 0 | 0 | 0 | 0 |
| 216 | 0 | 0 | 0 | 0 | 1 | 0 | 0 | 0 | 0 |
| 217 | 1 | 0 | 0 | 0 | 0 | 0 | 0 | 0 | 0 |
| 218 | 0 | 1 | 1 | 0 | 1 | 0 | 0 | 0 | 0 |
| 219 | 1 | 1 | 1 | 0 | 0 | 0 | 0 | 0 | 0 |
| 220 | 0 | 1 | 0 | 0 | 0 | 0 | 0 | 0 | 0 |
| 221 | 0 | 0 | 0 | 0 | 1 | 0 | 0 | 0 | 0 |
| 222 | 1 | 1 | 0 | 0 | 0 | 0 | 0 | 0 | 0 |
| 223 | 1 | 1 | 0 | 0 | 0 | 0 | 0 | 0 | 0 |
| 224 | 0 | 1 | 0 | 0 | 0 | 0 | 0 | 0 | 0 |

|     |   |   |   |   |   |   |   |   |   |
|-----|---|---|---|---|---|---|---|---|---|
| 225 | 0 | 1 | 0 | 0 | 0 | 0 | 0 | 0 | 0 |
| 226 | 0 | 0 | 0 | 0 | 1 | 0 | 0 | 0 | 0 |
| 227 | 1 | 0 | 0 | 0 | 1 | 0 | 0 | 0 | 0 |
| 228 | 0 | 1 | 0 | 0 | 0 | 0 | 0 | 0 | 0 |
| 229 | 1 | 1 | 0 | 0 | 0 | 0 | 1 | 0 | 0 |
| 230 | 0 | 1 | 0 | 0 | 0 | 0 | 0 | 0 | 0 |
| 231 | 0 | 1 | 0 | 0 | 0 | 0 | 0 | 0 | 0 |
| 232 | 0 | 1 | 0 | 0 | 1 | 0 | 0 | 0 | 0 |
| 233 | 1 | 1 | 0 | 0 | 0 | 0 | 0 | 0 | 0 |
| 234 | 0 | 0 | 0 | 0 | 1 | 0 | 1 | 0 | 0 |
| 235 | 1 | 1 | 0 | 0 | 0 | 0 | 0 | 0 | 0 |
| 236 | 0 | 1 | 0 | 0 | 1 | 0 | 0 | 0 | 0 |
| 237 | 0 | 1 | 0 | 0 | 0 | 0 | 0 | 0 | 0 |
| 238 | 0 | 0 | 0 | 0 | 0 | 0 | 1 | 0 | 0 |
| 239 | 0 | 1 | 0 | 0 | 1 | 0 | 0 | 0 | 0 |
| 240 | 0 | 1 | 0 | 0 | 1 | 0 | 0 | 0 | 0 |
| 241 | 1 | 0 | 0 | 0 | 0 | 0 | 0 | 0 | 0 |
| 242 | 1 | 0 | 0 | 0 | 0 | 0 | 0 | 0 | 0 |
| 243 | 1 | 0 | 0 | 0 | 0 | 0 | 0 | 0 | 0 |
| 244 | 1 | 1 | 0 | 0 | 0 | 0 | 0 | 0 | 0 |
| 245 | 1 | 0 | 0 | 0 | 0 | 0 | 0 | 0 | 0 |
| 246 | 1 | 1 | 0 | 0 | 0 | 0 | 0 | 0 | 0 |
| 247 | 1 | 1 | 0 | 0 | 0 | 0 | 0 | 0 | 0 |
| 248 | 1 | 1 | 0 | 0 | 0 | 0 | 0 | 0 | 0 |
| 249 | 1 | 1 | 0 | 0 | 0 | 0 | 0 | 0 | 0 |
| 250 | 0 | 0 | 1 | 0 | 0 | 1 | 0 | 0 | 0 |
| 251 | 0 | 1 | 0 | 0 | 0 | 0 | 0 | 0 | 0 |
| 252 | 1 | 0 | 0 | 0 | 0 | 0 | 0 | 0 | 0 |
| 253 | 0 | 1 | 0 | 0 | 0 | 0 | 1 | 0 | 0 |
| 254 | 1 | 1 | 1 | 0 | 0 | 0 | 0 | 0 | 0 |
| 255 | 0 | 1 | 0 | 0 | 0 | 0 | 0 | 0 | 0 |
| 256 | 0 | 1 | 1 | 0 | 0 | 0 | 0 | 0 | 0 |

|     |   |   |   |   |   |   |   |   |   |
|-----|---|---|---|---|---|---|---|---|---|
| 257 | 1 | 1 | 0 | 0 | 0 | 0 | 0 | 0 | 0 |
| 258 | 1 | 1 | 0 | 0 | 0 | 0 | 0 | 0 | 0 |
| 259 | 1 | 1 | 0 | 0 | 0 | 0 | 0 | 0 | 0 |
| 260 | 1 | 0 | 0 | 0 | 0 | 0 | 0 | 0 | 0 |
| 261 | 1 | 0 | 0 | 0 | 1 | 0 | 0 | 0 | 0 |
| 262 | 1 | 1 | 0 | 0 | 0 | 0 | 0 | 0 | 0 |
| 263 | 0 | 1 | 0 | 0 | 0 | 0 | 0 | 0 | 0 |
| 264 | 1 | 0 | 0 | 0 | 0 | 0 | 0 | 0 | 0 |
| 265 | 1 | 1 | 0 | 0 | 0 | 0 | 0 | 0 | 0 |
| 266 | 1 | 1 | 0 | 0 | 0 | 0 | 0 | 0 | 0 |
| 267 | 1 | 1 | 0 | 0 | 0 | 0 | 0 | 0 | 0 |
| 268 | 1 | 0 | 0 | 0 | 0 | 0 | 0 | 0 | 0 |
| 269 | 1 | 0 | 0 | 0 | 0 | 0 | 0 | 0 | 0 |
| 270 | 1 | 1 | 0 | 0 | 0 | 0 | 0 | 0 | 0 |
| 271 | 1 | 0 | 0 | 0 | 0 | 0 | 0 | 0 | 0 |
| 272 | 1 | 0 | 0 | 0 | 0 | 0 | 0 | 0 | 0 |
| 273 | 0 | 1 | 0 | 0 | 0 | 0 | 0 | 0 | 0 |
| 274 | 0 | 0 | 0 | 0 | 0 | 0 | 1 | 0 | 0 |
| 275 | 1 | 0 | 0 | 0 | 0 | 0 | 0 | 0 | 0 |
| 276 | 0 | 1 | 0 | 0 | 0 | 0 | 0 | 0 | 0 |
| 277 | 0 | 1 | 0 | 0 | 0 | 0 | 0 | 0 | 0 |
| 278 | 1 | 0 | 0 | 0 | 0 | 0 | 0 | 0 | 0 |
| 279 | 0 | 1 | 0 | 0 | 0 | 0 | 1 | 0 | 0 |
| 280 | 0 | 1 | 0 | 0 | 1 | 0 | 0 | 0 | 0 |
| 281 | 0 | 1 | 0 | 0 | 0 | 0 | 0 | 0 | 0 |
| 282 | 1 | 1 | 1 | 0 | 0 | 0 | 0 | 0 | 0 |
| 283 | 1 | 1 | 0 | 0 | 0 | 0 | 0 | 0 | 0 |
| 284 | 1 | 1 | 0 | 0 | 0 | 0 | 0 | 0 | 0 |
| 285 | 1 | 1 | 0 | 0 | 0 | 0 | 0 | 0 | 0 |
| 286 | 0 | 1 | 0 | 0 | 0 | 0 | 0 | 0 | 0 |
| 287 | 0 | 1 | 0 | 0 | 1 | 0 | 0 | 0 | 0 |
| 288 | 0 | 0 | 0 | 0 | 1 | 0 | 0 | 0 | 0 |

|     |   |   |   |   |   |   |   |   |   |
|-----|---|---|---|---|---|---|---|---|---|
| 289 | 1 | 1 | 0 | 0 | 0 | 0 | 0 | 0 | 0 |
| 290 | 1 | 1 | 0 | 0 | 0 | 0 | 0 | 0 | 0 |
| 291 | 0 | 1 | 0 | 0 | 1 | 0 | 0 | 0 | 0 |
| 292 | 1 | 1 | 0 | 0 | 0 | 0 | 0 | 0 | 0 |
| 293 | 1 | 1 | 0 | 0 | 0 | 1 | 0 | 0 | 0 |
| 294 | 1 | 1 | 0 | 0 | 0 | 0 | 1 | 1 | 0 |
| 295 | 1 | 1 | 0 | 0 | 0 | 0 | 0 | 0 | 0 |
| 296 | 1 | 1 | 1 | 0 | 0 | 0 | 0 | 1 | 0 |
| 297 | 1 | 0 | 0 | 0 | 0 | 0 | 0 | 0 | 0 |
| 298 | 1 | 0 | 0 | 0 | 0 | 0 | 0 | 0 | 0 |
| 299 | 1 | 1 | 0 | 0 | 0 | 0 | 0 | 0 | 0 |
| 300 | 1 | 1 | 0 | 0 | 0 | 0 | 0 | 0 | 0 |
| 301 | 0 | 1 | 0 | 0 | 0 | 0 | 0 | 0 | 0 |
| 302 | 1 | 1 | 0 | 0 | 0 | 0 | 0 | 0 | 0 |
| 303 | 1 | 1 | 0 | 0 | 0 | 0 | 0 | 0 | 0 |
| 304 | 1 | 1 | 0 | 0 | 0 | 0 | 0 | 0 | 0 |
| 305 | 1 | 1 | 0 | 0 | 0 | 0 | 0 | 0 | 0 |
| 306 | 1 | 1 | 0 | 0 | 0 | 0 | 0 | 0 | 0 |
| 307 | 1 | 1 | 0 | 0 | 1 | 0 | 0 | 0 | 0 |
| 308 | 1 | 1 | 0 | 0 | 1 | 0 | 0 | 0 | 0 |
| 309 | 0 | 1 | 0 | 0 | 1 | 0 | 0 | 0 | 0 |
| 310 | 1 | 1 | 0 | 0 | 0 | 0 | 0 | 0 | 0 |
| 311 | 1 | 1 | 0 | 0 | 0 | 0 | 0 | 0 | 0 |
| 312 | 1 | 0 | 0 | 0 | 0 | 0 | 0 | 0 | 0 |
| 313 | 1 | 0 | 0 | 0 | 1 | 0 | 0 | 0 | 0 |
| 314 | 1 | 1 | 0 | 0 | 1 | 0 | 0 | 0 | 0 |
| 315 | 1 | 0 | 0 | 0 | 0 | 0 | 0 | 0 | 0 |
| 316 | 0 | 0 | 0 | 0 | 1 | 0 | 0 | 0 | 0 |
| 317 | 1 | 1 | 0 | 0 | 0 | 0 | 0 | 0 | 0 |
| 318 | 1 | 0 | 0 | 0 | 0 | 0 | 0 | 0 | 0 |
| 319 | 0 | 0 | 0 | 0 | 1 | 0 | 0 | 0 | 0 |
| 320 | 1 | 1 | 0 | 0 | 1 | 0 | 0 | 0 | 0 |

|     |   |   |   |   |   |   |   |   |   |
|-----|---|---|---|---|---|---|---|---|---|
| 321 | 1 | 0 | 0 | 0 | 0 | 0 | 0 | 0 | 0 |
| 322 | 1 | 1 | 0 | 0 | 0 | 0 | 0 | 0 | 0 |
| 323 | 1 | 0 | 0 | 0 | 0 | 0 | 0 | 0 | 0 |
| 324 | 0 | 1 | 0 | 0 | 0 | 0 | 0 | 0 | 0 |
| 325 | 1 | 1 | 0 | 0 | 0 | 0 | 0 | 0 | 0 |
| 326 | 1 | 0 | 0 | 0 | 0 | 0 | 0 | 0 | 0 |
| 327 | 1 | 0 | 0 | 0 | 0 | 0 | 0 | 0 | 0 |
| 328 | 1 | 1 | 0 | 0 | 0 | 0 | 0 | 0 | 0 |
| 329 | 1 | 1 | 0 | 0 | 0 | 0 | 0 | 0 | 0 |
| 330 | 1 | 1 | 0 | 0 | 1 | 0 | 0 | 0 | 0 |
| 331 | 1 | 1 | 0 | 0 | 0 | 0 | 0 | 0 | 0 |
| 332 | 1 | 0 | 0 | 0 | 0 | 0 | 0 | 0 | 0 |
| 333 | 1 | 0 | 0 | 0 | 0 | 0 | 0 | 0 | 0 |
| 334 | 1 | 1 | 0 | 0 | 0 | 0 | 0 | 0 | 0 |
| 335 | 0 | 1 | 0 | 0 | 1 | 0 | 0 | 0 | 0 |
| 336 | 1 | 0 | 0 | 0 | 0 | 0 | 0 | 1 | 0 |
| 337 | 1 | 1 | 0 | 0 | 1 | 0 | 0 | 0 | 0 |
| 338 | 1 | 1 | 0 | 0 | 0 | 0 | 0 | 0 | 0 |
| 339 | 1 | 0 | 0 | 0 | 0 | 0 | 1 | 0 | 0 |
| 340 | 1 | 0 | 0 | 0 | 1 | 0 | 1 | 0 | 0 |
| 341 | 1 | 1 | 0 | 0 | 0 | 0 | 1 | 0 | 0 |
| 342 | 1 | 1 | 0 | 0 | 0 | 0 | 0 | 0 | 0 |
| 343 | 0 | 1 | 0 | 0 | 0 | 0 | 0 | 0 | 0 |
| 344 | 1 | 1 | 0 | 0 | 0 | 0 | 0 | 0 | 0 |
| 345 | 1 | 1 | 1 | 0 | 0 | 0 | 0 | 0 | 0 |
| 346 | 1 | 1 | 0 | 0 | 0 | 0 | 0 | 0 | 0 |
| 347 | 1 | 1 | 0 | 0 | 0 | 0 | 0 | 0 | 0 |
| 348 | 1 | 1 | 0 | 0 | 0 | 0 | 0 | 0 | 0 |
| 349 | 1 | 1 | 1 | 0 | 0 | 0 | 0 | 0 | 0 |
| 350 | 1 | 0 | 1 | 0 | 0 | 0 | 0 | 0 | 0 |
| 351 | 1 | 0 | 0 | 0 | 0 | 0 | 0 | 0 | 0 |
| 352 | 1 | 0 | 0 | 0 | 0 | 0 | 0 | 0 | 0 |



|     |   |   |   |   |   |   |   |   |   |
|-----|---|---|---|---|---|---|---|---|---|
| 353 | 0 | 1 | 0 | 0 | 0 | 0 | 0 | 0 | 0 |
| 354 | 1 | 0 | 1 | 0 | 0 | 0 | 0 | 0 | 0 |
| 355 | 1 | 0 | 0 | 0 | 0 | 0 | 0 | 0 | 0 |
| 356 | 1 | 1 | 0 | 0 | 0 | 0 | 0 | 0 | 0 |
| 357 | 0 | 1 | 0 | 0 | 0 | 0 | 0 | 0 | 0 |
| 358 | 1 | 0 | 0 | 0 | 0 | 0 | 0 | 0 | 0 |
| 359 | 1 | 0 | 0 | 0 | 0 | 0 | 0 | 0 | 0 |
| 360 | 0 | 1 | 0 | 0 | 0 | 0 | 0 | 0 | 0 |
| 361 | 1 | 0 | 0 | 0 | 0 | 0 | 0 | 0 | 0 |
| 362 | 1 | 0 | 0 | 0 | 0 | 0 | 0 | 0 | 0 |
| 363 | 1 | 0 | 0 | 0 | 0 | 0 | 0 | 0 | 0 |
| 364 | 1 | 1 | 0 | 0 | 0 | 0 | 0 | 0 | 0 |
| 365 | 1 | 1 | 0 | 0 | 0 | 0 | 0 | 0 | 0 |
| 366 | 0 | 1 | 1 | 0 | 0 | 0 | 0 | 0 | 0 |
| 367 | 0 | 1 | 0 | 0 | 0 | 0 | 0 | 0 | 0 |
| 368 | 0 | 1 | 0 | 0 | 1 | 0 | 0 | 0 | 0 |
| 369 | 0 | 1 | 1 | 0 | 0 | 0 | 0 | 0 | 0 |
| 370 | 1 | 1 | 0 | 0 | 0 | 0 | 0 | 0 | 0 |
| 371 | 0 | 1 | 0 | 0 | 1 | 0 | 0 | 0 | 0 |
| 372 | 0 | 1 | 0 | 0 | 0 | 0 | 0 | 0 | 0 |
| 373 | 1 | 1 | 0 | 0 | 0 | 0 | 0 | 0 | 0 |
| 374 | 1 | 1 | 0 | 0 | 0 | 0 | 0 | 0 | 0 |
| 375 | 1 | 1 | 0 | 0 | 0 | 0 | 0 | 0 | 0 |
| 376 | 1 | 0 | 0 | 0 | 1 | 0 | 0 | 0 | 0 |
| 377 | 1 | 0 | 0 | 0 | 1 | 0 | 0 | 0 | 0 |
| 378 | 0 | 0 | 1 | 0 | 0 | 0 | 0 | 0 | 0 |
| 379 | 1 | 1 | 0 | 0 | 0 | 0 | 0 | 0 | 0 |
| 380 | 1 | 1 | 0 | 0 | 0 | 0 | 0 | 0 | 0 |
| 381 | 1 | 0 | 0 | 0 | 0 | 0 | 0 | 1 | 0 |
| 382 | 1 | 0 | 0 | 0 | 0 | 0 | 0 | 0 | 0 |
| 383 | 0 | 0 | 1 | 0 | 0 | 0 | 0 | 0 | 0 |
| 384 | 1 | 1 | 0 | 0 | 0 | 0 | 0 | 0 | 0 |

|     |   |   |   |   |   |   |   |   |   |
|-----|---|---|---|---|---|---|---|---|---|
| 385 | 1 | 0 | 0 | 0 | 0 | 0 | 0 | 0 | 0 |
| 386 | 1 | 1 | 0 | 0 | 0 | 0 | 0 | 0 | 0 |
| 387 | 1 | 1 | 0 | 0 | 0 | 0 | 0 | 0 | 0 |
| 388 | 0 | 1 | 0 | 0 | 0 | 0 | 0 | 0 | 0 |
| 389 | 1 | 0 | 1 | 0 | 0 | 0 | 0 | 0 | 0 |
| 390 | 1 | 1 | 0 | 0 | 0 | 0 | 0 | 0 | 0 |
| 391 | 1 | 1 | 0 | 0 | 0 | 0 | 0 | 0 | 0 |
| 392 | 0 | 1 | 0 | 0 | 0 | 0 | 0 | 0 | 0 |
| 393 | 0 | 0 | 0 | 0 | 0 | 0 | 0 | 1 | 0 |
| 394 | 1 | 0 | 0 | 0 | 0 | 0 | 0 | 1 | 0 |
| 395 | 1 | 0 | 0 | 0 | 0 | 0 | 1 | 0 | 0 |
| 396 | 0 | 1 | 0 | 0 | 1 | 0 | 0 | 0 | 0 |
| 397 | 0 | 1 | 0 | 0 | 0 | 0 | 1 | 0 | 0 |
| 398 | 1 | 0 | 0 | 0 | 0 | 0 | 0 | 0 | 0 |
| 399 | 1 | 0 | 0 | 0 | 1 | 0 | 0 | 0 | 0 |
| 400 | 0 | 0 | 0 | 0 | 1 | 0 | 0 | 0 | 0 |

| <b>Organisms</b>    | <b>Isolated from No. of swab samples</b> |
|---------------------|------------------------------------------|
| Staphylococcus (B1) | 196                                      |
| Bacillus (B2)       | 186                                      |
| Serratia (B3)       | 22                                       |
| Rhodococcus (B4)    | 1                                        |
| Pseudomonas (B5)    | 55                                       |
| Acinetobacter (B6)  | 4                                        |
| Enterobacter (B7)   | 14                                       |
| Candida (F1)        | 7                                        |
| Klebsiella (B8)     | 2                                        |
