# Supplementary material for: Bacteria in the oral cavity of individuals consuming intoxicating substances
Source: PubMed Central journal article supplement (PMC10218728; doi:10.1371/journal.pone.0285753), 2023-05-26
Supplement: pone.0285753.s006.pdf [file pone.0285753.s006.pdf]

**S6-Table: Descriptive statistics of the samples/participants of different age groups, consumers and non-consumers of intoxicating substances.**

| Intoxication Type | Sole Betel Nut Consumers |               |                             | Sole Gutkha Consumers |             |                           | Sole Smokers |             |                           | Sole Alcohol Consumers |             |                           | Combined Intoxication |              |                              | Non Consumers |               |                             | Grand Total                  |
|-------------------|--------------------------|---------------|-----------------------------|-----------------------|-------------|---------------------------|--------------|-------------|---------------------------|------------------------|-------------|---------------------------|-----------------------|--------------|------------------------------|---------------|---------------|-----------------------------|------------------------------|
|                   | Male                     | Female        | Total                       | Male                  | Female      | Total                     | Male         | Female      | Total                     | Male                   | Female      | Total                     | Male                  | Female       | Total                        | Male          | Female        | Total                       |                              |
| Age group (years) |                          |               |                             |                       |             |                           |              |             |                           |                        |             |                           |                       |              |                              |               |               |                             |                              |
| 19-24             | 9<br>(3.0%)              | 20<br>(6.7%)  | <b>29</b><br><b>(9.7%)</b>  | 3<br>(1.0%)           | 1<br>(0.3%) | <b>4</b><br><b>(1.3%)</b> | 1<br>(0.3%)  | -           | <b>1</b><br><b>(0.3%)</b> | 1<br>(0.3%)            | 1<br>(0.3%) | <b>2</b><br><b>(0.7%)</b> | 31<br>(10.3%)         | 6<br>(2.0%)  | <b>37</b><br><b>(12.3%)</b>  | 22<br>(7.3%)  | 11<br>(3.7%)  | <b>33</b><br><b>(11%)</b>   | <b>106</b><br><b>(35.3%)</b> |
| 25-30             | 5<br>(1.7%)              | 14<br>(4.7%)  | <b>19</b><br><b>(6.3%)</b>  | 2<br>(0.7%)           | -           | <b>2</b><br><b>(0.7%)</b> | 1<br>(0.3%)  | 1<br>(0.3%) | <b>2</b><br><b>(0.7%)</b> | 2<br>(0.7%)            | -           | <b>2</b><br><b>(0.7%)</b> | 25<br>(8.3%)          | 2<br>(0.7%)  | <b>27</b><br><b>(9.0%)</b>   | 20<br>(6.7%)  | 19<br>(6.3%)  | <b>39</b><br><b>(13%)</b>   | <b>91</b><br><b>(30.3%)</b>  |
| 31-36             | 3<br>(1.0%)              | 7<br>(2.3%)   | <b>10</b><br><b>(3.3%)</b>  | -                     | -           | -                         | -            | -           | -                         | -                      | -           | -                         | 9<br>(3.0%)           | 2<br>(0.7%)  | <b>11</b><br><b>(3.7%)</b>   | 10<br>(3.3%)  | 3<br>(1%)     | <b>13</b><br><b>(4.3%)</b>  | <b>34</b><br><b>(11.3%)</b>  |
| 37-42             | 2<br>(0.7%)              | 13<br>(4.3%)  | <b>15</b><br><b>(5.0%)</b>  | -                     | -           | -                         | -            | -           | -                         | -                      | -           | -                         | 6<br>(2.0%)           | 1<br>(0.3%)  | <b>7</b><br><b>(2.3%)</b>    | 1<br>(0.3%)   | 1<br>(0.3%)   | <b>2</b><br><b>(0.7%)</b>   | <b>24</b><br><b>(8.0%)</b>   |
| 43-48             | 2<br>(0.7%)              | 6<br>(2.0%)   | <b>8</b><br><b>(2.7%)</b>   | -                     | -           | -                         | -            | -           | -                         | -                      | -           | -                         | 7<br>(2.3%)           | 1<br>(0.3%)  | <b>8</b><br><b>(2.7%)</b>    | 1<br>(0.3%)   | -             | <b>1</b><br><b>(0.3%)</b>   | <b>17</b><br><b>(5.7%)</b>   |
| 49-54             | -                        | 1<br>(0.3%)   | <b>1</b><br><b>(0.3%)</b>   | -                     | -           | -                         | -            | -           | -                         | -                      | -           | -                         | 8<br>(2.7%)           | 1<br>(0.3%)  | <b>9</b><br><b>(3.0%)</b>    | 1<br>(0.3%)   | -             | <b>1</b><br><b>(0.3%)</b>   | <b>11</b><br><b>(3.7%)</b>   |
| 55-60             | 4<br>(1.3%)              | 6<br>(2.0%)   | <b>10</b><br><b>(3.3%)</b>  | -                     | -           | -                         | -            | -           | -                         | -                      | -           | -                         | 7<br>(2.3%)           | -            | <b>7</b><br><b>(2.3%)</b>    | -             | -             | -                           | <b>17</b><br><b>(5.7%)</b>   |
| Total             | 25<br>(8.3%)             | 67<br>(22.3%) | <b>92</b><br><b>(30.7%)</b> | 5<br>(1.7%)           | 1<br>(0.3%) | <b>6</b><br><b>(2.0%)</b> | 2<br>(0.7%)  | 1<br>(0.3%) | <b>3</b><br><b>(1.0%)</b> | 3<br>(1.0%)            | 1<br>(0.3%) | <b>4</b><br><b>(1.3%)</b> | 93<br>(31%)           | 13<br>(4.3%) | <b>106</b><br><b>(35.3%)</b> | 55<br>(18.3%) | 34<br>(11.3%) | <b>89</b><br><b>(29.7%)</b> | <b>300</b><br><b>(100%)</b>  |
