# Supplementary material for: Bacteria in the oral cavity of individuals consuming intoxicating substances
Source: PubMed Central journal article supplement (PMC10218728; doi:10.1371/journal.pone.0285753), 2023-05-26
Supplement: pone.0285753.s007.pdf [file pone.0285753.s007.pdf]

| <b>S7-Table: Oral cavity cleanliness record of the participants (male and female) grouped by age.</b> |             |        |                           |                |              |                              |               |               |                             |             |             |                           |                             |
|-------------------------------------------------------------------------------------------------------|-------------|--------|---------------------------|----------------|--------------|------------------------------|---------------|---------------|-----------------------------|-------------|-------------|---------------------------|-----------------------------|
| <b>Brushing times/Day</b>                                                                             | 0           |        |                           | 1              |              |                              | 2             |               |                             | 3           |             |                           | <b>Grand Total</b>          |
| <b>Age group (Years)</b>                                                                              | MALE        | FEMALE | TOTAL                     | MALE           | FEMALE       | TOTAL                        | MALE          | FEMALE        | TOTAL                       | MALE        | FEMALE      | TOTAL                     |                             |
| <b>19-24</b>                                                                                          | 2<br>(0.7%) | 0      | <b>2</b><br><b>(0.7%)</b> | 44<br>(14.7%)  | 21<br>(7%)   | <b>65</b><br><b>(21.7%)</b>  | 20<br>(6.7%)  | 18<br>(6%)    | <b>38</b><br><b>(12.7%)</b> | 1<br>(0.3%) | 0           | <b>1</b><br><b>(0.3%)</b> | <b>106</b><br><b>35.3%</b>  |
| <b>25-30</b>                                                                                          | 0           | 0      | <b>0</b>                  | 37<br>(12.3%)  | 20<br>(6.7%) | <b>57</b><br><b>(19%)</b>    | 17<br>(5.7%)  | 15<br>(5%)    | <b>32</b><br><b>(10.7%)</b> | 1<br>(0.3%) | 1<br>(0.3%) | <b>2</b><br><b>(0.7%)</b> | <b>91</b><br><b>(30.3%)</b> |
| <b>31-36</b>                                                                                          | 0           | 0      | <b>0</b>                  | 13<br>(4.3%)   | 3<br>(1%)    | <b>16</b><br><b>(5.3%)</b>   | 9<br>(3%)     | 9<br>(3%)     | <b>18</b><br><b>(6%)</b>    | 0           | 0           | <b>0</b>                  | <b>34</b><br><b>(11.3%)</b> |
| <b>37-42</b>                                                                                          | 0           | 0      | <b>0</b>                  | 6<br>(2%)      | 5<br>(1.7%)  | <b>11</b><br><b>(3.7%)</b>   | 3<br>(1%)     | 7<br>(2.3%)   | <b>10</b><br><b>(3.3%)</b>  | 0           | 3<br>(1%)   | <b>3</b><br><b>(1%)</b>   | <b>24</b><br><b>(8%)</b>    |
| <b>43-48</b>                                                                                          | 0           | 0      | <b>0</b>                  | 7<br>(2.3%)    | 1<br>(0.3%)  | <b>8</b><br><b>(2.7%)</b>    | 3<br>(1%)     | 4<br>(1.3%)   | <b>7</b><br><b>(2.3%)</b>   | 0           | 2<br>(0.7%) | <b>2</b><br><b>(0.7%)</b> | <b>17</b><br><b>(5.7%)</b>  |
| <b>49-54</b>                                                                                          | 0           | 0      | <b>0</b>                  | 7<br>(2.3%)    | 1<br>(0.3%)  | <b>8</b><br><b>(2.7%)</b>    | 2<br>(0.7%)   | 1<br>(0.3%)   | <b>3</b><br><b>(1%)</b>     | 0           | 0           | <b>0</b>                  | <b>11</b><br><b>(3.7%)</b>  |
| <b>55-60</b>                                                                                          | 0           | 0      | <b>0</b>                  | 7<br>(2.3%)    | 3<br>(1%)    | <b>10</b><br><b>(3.3%)</b>   | 4<br>(1.3%)   | 2<br>(0.7%)   | <b>6</b><br><b>(2%)</b>     | 0           | 1<br>(0.3%) | <b>1</b><br><b>(0.3%)</b> | <b>17</b><br><b>(5.7%)</b>  |
| <b>Total</b>                                                                                          | 2<br>(0.7%) | 0      | <b>2</b><br><b>(0.7%)</b> | 121<br>(40.3%) | 54<br>(18%)  | <b>175</b><br><b>(58.3%)</b> | 58<br>(19.3%) | 56<br>(18.7%) | <b>114</b><br><b>(38%)</b>  | 2<br>(0.7%) | 7<br>(2.3%) | <b>9</b><br><b>(3%)</b>   | <b>300</b><br><b>(100%)</b> |
