# Supplementary material for: Bacteria in the oral cavity of individuals consuming intoxicating substances
Source: PubMed Central journal article supplement (PMC10218728; doi:10.1371/journal.pone.0285753), 2023-05-26
Supplement: pone.0285753.s008.pdf [file pone.0285753.s008.pdf]

**S8-Table: Risk of incidence of Microbes when exposed to intoxicating substances.**

| Organism                     | Intoxicating Substances | B      | S.E.  | Wald   | Sig.  | 95% C.I. for EXP(B) |       |        |
|------------------------------|-------------------------|--------|-------|--------|-------|---------------------|-------|--------|
|                              |                         |        |       |        |       | Upper               | Lower | Exp(B) |
| B1 ( <i>Staphylococcus</i> ) | Betel nut               | 0.564  | 0.246 | 5.256  | 0.022 | 2.849               | 1.085 | 1.759  |
|                              | Smoking                 | 0.402  | 0.179 | 5.041  | 0.025 | 2.121               | 1.052 | 1.494  |
|                              | Non consumers           | -.405  | .183  | 4.890  | .027  | .955                | .466  | .667   |
| B2 ( <i>Bacillus</i> )       | Betel nut               | 0.557  | 0.175 | 10.071 | 0.002 | 2.461               | 1.237 | 1.745  |
|                              | Betel nut with lime     | 0.941  | 0.326 | 8.303  | 0.004 | 4.857               | 1.351 | 2.562  |
|                              | Non consumers           | -.368  | .193  | 3.651  | .056  | 1.010               | .474  | .692   |
| B3 ( <i>Serratia</i> )       | Betel nut               | -0.994 | 0.421 | 5.578  | 0.018 | 0.844               | 0.162 | 0.37   |
|                              | Zarda pan               | 1.759  | 0.616 | 8.148  | 0.004 | 0.576               | 0.051 | 0.172  |
|                              | Smoking                 | 1.74   | 0.285 | 37.175 | 0     | 0.307               | 0.1   | 0.175  |
|                              | Alcohol                 | 2.024  | 0.743 | 7.42   | 0.006 | 0.567               | 0.031 | 0.132  |
| B4 ( <i>Rhodococcus</i> )    | Betel nut               | 1.892  | 1.074 | 3.099  | 0.078 | 1.239               | 0.018 | 0.151  |
|                              | Mitha pan               | 3.113  | 1.022 | 9.274  | 0.002 | 0.33                | 0.006 | 0.044  |
|                              | Smoking                 | 4.622  | 1.02  | 20.526 | 0     | 0.073               | 0.001 | 0.01   |
| B5 ( <i>Pseudomonas</i> )    | Betel nut               | -0.521 | 0.303 | 2.961  | 0.085 | 1.075               | 0.328 | 0.594  |
|                              | Zarda pan               | 1.27   | 0.498 | 6.499  | 0.011 | 0.746               | 0.106 | 0.281  |
|                              | Gutkha                  | -0.893 | 0.486 | 3.381  | 0.066 | 1.061               | 0.158 | 0.409  |
|                              | Sikhar                  | 1.086  | 0.531 | 4.19   | 0.041 | 8.383               | 1.047 | 2.963  |
|                              | Smoking                 | 1.191  | 0.225 | 28.001 | 0     | 0.473               | 0.196 | 0.304  |
|                              | Non consumers           | -.865  | .328  | 6.948  | .008  | .801                | .221  | .421   |
| B6 ( <i>Acinetobacter</i> )  | Mitha pan               | 2.717  | 1.032 | 6.926  | 0.008 | 0.5                 | 0.009 | 0.066  |
|                              | Gutkha                  | 1.612  | 0.771 | 4.367  | 0.037 | 0.905               | 0.044 | 0.199  |
|                              | Smoking                 | 4.339  | 0.712 | 37.124 | 0     | 0.053               | 0.003 | 0.013  |
| B7 ( <i>Enterobacter</i> )   | Mitha pan               | 1.426  | 0.636 | 5.034  | 0.025 | 0.835               | 0.069 | 0.24   |
|                              | Gutkha                  | -0.836 | 0.669 | 1.56   | 0.212 | 1.609               | 0.117 | 0.434  |
|                              | Smoking                 | 2.585  | 0.302 | 73.277 | 0     | 0.136               | 0.042 | 0.075  |
| B8 ( <i>Klebsiella</i> )     | Mitha pan               | 2.694  | 1.034 | 6.791  | 0.009 | 0.513               | 0.009 | 0.068  |
|                              | Gutkha                  | 2.522  | 1.039 | 5.889  | 0.015 | 0.616               | 0.01  | 0.08   |
|                              | Smoking                 | 4.449  | 0.711 | 39.106 | 0     | 0.047               | 0.003 | 0.012  |
| F1 ( <i>Candida</i> )        | Betel nut               | 1.221  | 0.689 | 3.141  | 0.076 | 1.138               | 0.076 | 0.295  |
|                              | Zarda pan               | 1.105  | 1.103 | 1.003  | 0.317 | 2.878               | 0.038 | 0.331  |
|                              | Mitha pan               | 1.421  | 0.777 | 3.345  | 0.067 | 1.107               | 0.053 | 0.242  |
|                              | Smoking                 | 2.586  | 0.448 | 33.287 | 0     | 0.181               | 0.031 | 0.075  |

The table include odd ratio which significantly contributes to the regression.

CI Confidence interval, S.E. Standard error, B Coefficient, EXP (B) Odds ratio, Sig. Significance level
