# Supplementary material for: Bacteria in the oral cavity of individuals consuming intoxicating substances
Source: PubMed Central journal article supplement (PMC10218728; doi:10.1371/journal.pone.0285753), 2023-05-26
Supplement: pone.0285753.s009.pdf [file pone.0285753.s009.pdf]

**S9-Table: Risk of health issues when exposed to intoxicating substances.**

| Health Conditions        | Intoxicating Substances | B      | S.E.  | Wald   | Sig.  | 95% C.I. for EXP(B) |       |        |
|--------------------------|-------------------------|--------|-------|--------|-------|---------------------|-------|--------|
|                          |                         |        |       |        |       | Upper               | Lower | Exp(B) |
| Acute cellulites (AC)    | Betel nut               | -0.567 | 0.196 | 8.361  | 0.004 | 0.833               | 0.386 | 0.567  |
|                          | Gutkha                  | -1.105 | 0.423 | 6.839  | 0.009 | 0.758               | 0.145 | 0.331  |
|                          | Sikhar                  | 0.942  | 0.473 | 3.973  | 0.046 | 6.482               | 1.016 | 2.566  |
|                          | Smoking                 | -0.757 | 0.389 | 3.79   | 0.052 | 1.005               | 0.219 | 0.469  |
|                          | Non consumers           | -2.456 | .740  | 11.019 | .001  | .366                | .020  | .086   |
| Anorexia (AN)            | Betel nut               | -1.408 | 0.233 | 36.478 | 0     | 0.386               | 0.155 | 0.245  |
|                          | Betel nut with lime     | 0.87   | 0.377 | 5.326  | 0.021 | 4.997               | 1.14  | 2.387  |
| Appetite condition (APC) | Betel nut               | -1.117 | 0.235 | 22.565 | 0     | 0.519               | 0.206 | 0.327  |
|                          | Mitha pan               | -1.411 | 0.427 | 10.924 | 0.001 | 0.563               | 0.106 | 0.244  |
|                          | Smoking                 | -0.94  | 0.513 | 3.361  | 0.067 | 1.067               | 0.143 | 0.391  |
| Arthralgia (AR)          | Betel nut               | -0.679 | 0.196 | 12     | 0.001 | 0.745               | 0.345 | 0.507  |
|                          | Sikhar                  | -1.017 | 0.469 | 4.71   | 0.03  | 0.906               | 0.144 | 0.362  |
|                          | Smoking                 | -1.163 | 0.435 | 7.152  | 0.007 | 0.733               | 0.133 | 0.312  |
| Drowsiness (D)           | Betel nut               | 0.317  | 0.161 | 3.898  | 0.048 | 1.881               | 1.002 | 1.373  |
|                          | Non consumers           | -1.334 | .323  | 17.064 | .000  | .496                | .140  | .263   |
| Gingivitis (G)           | Betel nut               | -0.729 | 0.189 | 14.8   | 0     | 0.699               | 0.333 | 0.482  |
|                          | Gutkha                  | -0.672 | 0.312 | 4.625  | 0.032 | 0.942               | 0.277 | 0.511  |
| Granuloma (GL)           | Betel nut               | -1.302 | 0.193 | 45.309 | 0     | 0.397               | 0.186 | 0.272  |
| Headache (H)             | Betel nut               | 0.515  | 0.226 | 5.207  | 0.022 | 2.604               | 1.075 | 1.673  |
|                          | Betel nut with lime     | 0.705  | 0.415 | 2.887  | 0.089 | 4.569               | 0.897 | 2.025  |
|                          | Mitha pan               | 1.169  | 0.33  | 12.553 | 0     | 6.149               | 1.686 | 3.22   |
|                          | Smoking                 | -0.817 | 0.356 | 5.276  | 0.022 | 0.887               | 0.22  | 0.442  |
|                          | Non consumers           | .546   | .235  | 5.421  | .020  | 2.735               | 1.090 | 1.727  |
| Insomnia (INS)           | Betel nut               | -1.146 | 0.244 | 22.096 | 0     | 0.513               | 0.197 | 0.318  |
|                          | Betel nut with lime     | 0.684  | 0.386 | 3.15   | 0.076 | 4.221               | 0.931 | 1.982  |
|                          | Mitha pan               | -0.719 | 0.307 | 5.49   | 0.019 | 0.889               | 0.267 | 0.487  |
| Mouth ulceration (MU)    | Betel nut               | -1.124 | 0.184 | 37.182 | 0     | 0.466               | 0.226 | 0.325  |
|                          | Non consumers           | -1.140 | .516  | 4.874  | .027  | .880                | .116  | .320   |
| Myalgia (M)              | Betel nut               | -0.537 | 0.198 | 7.337  | 0.007 | 0.862               | 0.397 | 0.585  |
|                          | Mitha pan               | -0.751 | 0.301 | 6.243  | 0.012 | 0.851               | 0.262 | 0.472  |
|                          | Sikhar                  | -0.67  | 0.402 | 2.775  | 0.096 | 1.126               | 0.233 | 0.512  |
|                          | Betel nut               | -0.7   | 0.19  | 13.617 | 0     | 0.72                | 0.342 | 0.496  |
| Nausea (N)               | Gutkha                  | -0.96  | 0.332 | 8.368  | 0.004 | 0.734               | 0.2   | 0.383  |
|                          | Non consumers           | -.873  | .449  | 3.780  | .052  | 1.007               | .173  | .418   |
|                          | Betel nut               | -2.134 | 0.351 | 37.043 | 0     | 0.235               | 0.06  | 0.118  |
| Oral cancer (OC)         | Mitha pan               | -1.912 | 0.561 | 11.597 | 0.001 | 0.444               | 0.049 | 0.148  |
|                          | Gutkha                  | -2.427 | 0.68  | 12.747 | 0     | 0.335               | 0.023 | 0.088  |
|                          | Tobacco                 | 2.317  | 0.595 | 15.159 | 0     | 32.583              | 3.161 | 10.148 |
|                          | Betel nut               | 1.171  | 0.219 | 28.53  | 0     | 4.959               | 2.099 | 3.226  |
| Oral thrush (OT)         | Mitha pan               | -0.886 | 0.289 | 9.394  | 0.002 | 0.727               | 0.234 | 0.412  |
|                          | Sikhar                  | 0.676  | 0.383 | 3.117  | 0.077 | 4.164               | 0.928 | 1.966  |
|                          | Betel nut               | -1.333 | 0.24  | 30.726 | 0     | 0.422               | 0.165 | 0.264  |
| Osteomyelitis (OS)       | Mitha pan               | -1.271 | 0.399 | 10.126 | 0.001 | 0.614               | 0.128 | 0.281  |
|                          | Sikhar                  | -1.257 | 0.556 | 5.121  | 0.024 | 0.845               | 0.096 | 0.284  |
|                          | Betel nut               | -1.12  | 0.235 | 22.794 | 0     | 0.517               | 0.206 | 0.326  |
| Periodontitis (P)        | Mitha pan               | -0.648 | 0.341 | 3.6    | 0.058 | 1.022               | 0.268 | 0.523  |
|                          | Gutkha                  | -1.487 | 0.45  | 10.944 | 0.001 | 0.545               | 0.094 | 0.226  |
|                          | Betel nut with lime     | 1.888  | 0.421 | 20.126 | 0     | 15.077              | 2.896 | 6.608  |
| Vision (V)               | Mitha pan               | -0.552 | 0.29  | 3.616  | 0.057 | 1.017               | 0.326 | 0.576  |
|                          | Sikhar                  | -1.769 | 0.495 | 12.748 | 0     | 0.45                | 0.065 | 0.171  |

|               |        |       |       |       |       |       |      |
|---------------|--------|-------|-------|-------|-------|-------|------|
| Smoking       | -1.051 | 0.394 | 7.109 | 0.008 | 0.757 | 0.161 | 0.35 |
| Non consumers | -.639  | .341  | 3.501 | .061  | 1.031 | .270  | .528 |

The table include odd ratio which significantly contributes to the regression.

CI Confidence interval, S.E. Standard error, B Coefficient, EXP (*B*) Odds ratio, Sig. Significance level
