# Supplementary material for: Bacteria in the oral cavity of individuals consuming intoxicating substances
Source: PubMed Central journal article supplement (PMC10218728; doi:10.1371/journal.pone.0285753), 2023-05-26
Supplement: pone.0285753.s010.pdf [file pone.0285753.s010.pdf]

**S10-Table: Risk of health issues when exposed to Microorganisms.**

| Health condition         | Organisms                   | B      | S.E.  | Wald   | Sig.  | 95% C.I. for EXP(B) |       |        |
|--------------------------|-----------------------------|--------|-------|--------|-------|---------------------|-------|--------|
|                          |                             |        |       |        |       | Upper               | Lower | Exp(B) |
| Acute cellulites (AC)    | B1( <i>Staphylococcus</i> ) | -1.143 | 0.211 | 29.395 | 0.000 | 0.482               | 0.211 | 0.319  |
|                          | B2( <i>Bacillus</i> )       | -0.848 | 0.21  | 16.288 | 0.000 | 0.646               | 0.284 | 0.428  |
| Anorexia (AN)            | B1( <i>Staphylococcus</i> ) | -0.792 | 0.2   | 15.74  | 0.000 | 0.67                | 0.306 | 0.453  |
|                          | B2( <i>Bacillus</i> )       | -1.107 | 0.215 | 26.546 | 0.000 | 0.504               | 0.217 | 0.33   |
|                          | B3( <i>Serrat ia</i> )      | 0.836  | 0.469 | 3.179  | 0.075 | 5.778               | 0.92  | 2.306  |
| Appetite condition (APC) | B1( <i>Staphylococcus</i> ) | -1.481 | 0.248 | 35.754 | 0.000 | 0.369               | 0.14  | 0.227  |
|                          | B2( <i>Bacillus</i> )       | -1.511 | 0.259 | 33.91  | 0.000 | 0.367               | 0.133 | 0.221  |
| Arthralgia (AR)          | B1( <i>Staphylococcus</i> ) | -1.132 | 0.212 | 28.477 | 0.000 | 0.489               | 0.213 | 0.322  |
|                          | B2( <i>Bacillus</i> )       | -0.505 | 0.212 | 5.704  | 0.017 | 0.913               | 0.399 | 0.603  |
|                          | B5( <i>Pseudomonas</i> )    | -0.67  | 0.348 | 3.711  | 0.054 | 1.012               | 0.259 | 0.512  |
|                          | B7( <i>Enterobacter</i> )   | -1.851 | 1.053 | 3.093  | 0.079 | 1.236               | 0.02  | 0.157  |
| Drowsiness (D)           | B2( <i>Bacillus</i> )       | -0.254 | 0.151 | 2.835  | 0.092 | 1.043               | 0.577 | 0.776  |
|                          | B3( <i>Serrat ia</i> )      | -0.846 | 0.486 | 3.032  | 0.082 | 1.112               | 0.166 | 0.429  |
| Gingivitis (G)           | B1( <i>Staphylococcus</i> ) | -1.051 | 0.205 | 26.204 | 0.000 | 0.523               | 0.234 | 0.35   |
|                          | B2( <i>Bacillus</i> )       | -0.544 | 0.207 | 6.878  | 0.009 | 0.872               | 0.386 | 0.58   |
|                          | B5( <i>Pseudomonas</i> )    | -0.727 | 0.343 | 4.483  | 0.034 | 0.947               | 0.246 | 0.483  |
| Granuloma (GL)           | B1( <i>Staphylococcus</i> ) | -1.473 | 0.23  | 40.893 | 0.000 | 0.36                | 0.146 | 0.229  |
|                          | B2( <i>Bacillus</i> )       | -0.833 | 0.216 | 14.841 | 0.000 | 0.664               | 0.285 | 0.435  |
| Headache (H)             | B1( <i>Staphylococcus</i> ) | 0.414  | 0.185 | 4.998  | 0.025 | 2.176               | 1.052 | 1.513  |
|                          | B2( <i>Bacillus</i> )       | 0.618  | 0.191 | 10.46  | 0.001 | 2.696               | 1.275 | 1.854  |
| Insomnia (INS)           | B1( <i>Staphylococcus</i> ) | -1.005 | 0.21  | 22.887 | 0.000 | 0.552               | 0.242 | 0.366  |
|                          | B2( <i>Bacillus</i> )       | -0.676 | 0.216 | 9.816  | 0.002 | 0.776               | 0.333 | 0.509  |
|                          | B5( <i>Pseudomonas</i> )    | -0.86  | 0.368 | 5.45   | 0.020 | 0.871               | 0.206 | 0.423  |
|                          | B7( <i>Enterobacter</i> )   | -1.81  | 1.053 | 2.955  | 0.086 | 1.289               | 0.021 | 0.164  |
| Mouth ulceration (MU)    | B1( <i>Staphylococcus</i> ) | -0.961 | 0.211 | 20.721 | 0.000 | 0.578               | 0.253 | 0.382  |
|                          | B2( <i>Bacillus</i> )       | -1.03  | 0.227 | 20.505 | 0.000 | 0.558               | 0.229 | 0.357  |
|                          | B5( <i>Pseudomonas</i> )    | -0.931 | 0.382 | 5.94   | 0.015 | 0.833               | 0.186 | 0.394  |
| Myalgia (M)              | B1( <i>Staphylococcus</i> ) | -0.921 | 0.201 | 20.959 | 0.000 | 0.591               | 0.268 | 0.398  |
|                          | B2( <i>Bacillus</i> )       | -0.609 | 0.207 | 8.64   | 0.003 | 0.816               | 0.363 | 0.544  |
|                          | B5( <i>Pseudomonas</i> )    | -0.71  | 0.344 | 4.272  | 0.039 | 0.964               | 0.251 | 0.491  |
| Nausea (N)               | B1( <i>Staphylococcus</i> ) | -1.063 | 0.208 | 26.007 | 0.000 | 0.52                | 0.23  | 0.345  |
|                          | B2( <i>Bacillus</i> )       | -0.388 | 0.209 | 3.461  | 0.063 | 1.021               | 0.451 | 0.678  |
|                          | B3( <i>Serrat ia</i> )      | -1.116 | 0.641 | 3.026  | 0.082 | 1.152               | 0.093 | 0.328  |
|                          | B5( <i>Pseudomonas</i> )    | -1.009 | 0.365 | 7.625  | 0.006 | 0.746               | 0.178 | 0.365  |
| Oral cancer (OC)         | B1( <i>Staphylococcus</i> ) | -2.224 | 0.353 | 39.587 | 0.000 | 0.216               | 0.054 | 0.108  |
|                          | B2( <i>Bacillus</i> )       | -2.1   | 0.377 | 31.036 | 0.000 | 0.256               | 0.058 | 0.122  |
|                          | B5( <i>Pseudomonas</i> )    | -1.834 | 0.617 | 8.842  | 0.003 | 0.535               | 0.048 | 0.16   |
| Oral thrush (OT)         | B1( <i>Staphylococcus</i> ) | 0.331  | 0.148 | 4.994  | 0.025 | 1.861               | 1.042 | 1.392  |
|                          | B5( <i>Pseudomonas</i> )    | 0.695  | 0.296 | 5.502  | 0.019 | 3.581               | 1.121 | 2.003  |
| Osteomyelitis (OS)       | B1( <i>Staphylococcus</i> ) | -1.604 | 0.255 | 39.41  | 0.000 | 0.332               | 0.122 | 0.201  |
|                          | B2( <i>Bacillus</i> )       | -1.069 | 0.249 | 18.346 | 0.000 | 0.56                | 0.211 | 0.343  |
|                          | B5( <i>Pseudomonas</i> )    | -1.31  | 0.452 | 8.396  | 0.004 | 0.655               | 0.111 | 0.27   |
| Periodontitis (P)        | B1( <i>Staphylococcus</i> ) | -1.627 | 0.255 | 40.603 | 0.000 | 0.324               | 0.119 | 0.197  |
|                          | B2( <i>Bacillus</i> )       | -1.024 | 0.246 | 17.341 | 0.000 | 0.581               | 0.222 | 0.359  |
|                          | B5( <i>Pseudomonas</i> )    | -1.135 | 0.426 | 7.105  | 0.008 | 0.741               | 0.14  | 0.322  |
| Vision (V)               | B1( <i>Staphylococcus</i> ) | -0.555 | 0.182 | 9.252  | 0.002 | 0.821               | 0.402 | 0.574  |

|                       |        |       |       |       |       |       |       |
|-----------------------|--------|-------|-------|-------|-------|-------|-------|
| B2( <i>Bacillus</i> ) | -0.353 | 0.186 | 3.605 | 0.058 | 1.011 | 0.488 | 0.703 |
|-----------------------|--------|-------|-------|-------|-------|-------|-------|

The table include odd ratio which significantly contributes to the regression.

CI Confidence interval, S.E. Standard error, B Coefficient, EXP (*B*) Odds ratio, Sig. Significance level
